# Supplementary material for: Age, occupational class and sickness absence during pregnancy: a retrospective analysis study of the Norwegian population registry
Source: PubMed Central journal article supplement — BMJ Open. 2014 May 2;4(5):e004381. doi: 10.1136/bmjopen-2013-004381 (PMC4025458; doi:10.1136/bmjopen-2013-004381), 2014-05-02
Supplement: bmjopen-2013-004381.draft_revisions.pdf [file bmjopen-2013-004381.draft_revisions.pdf]

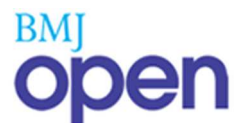

**Age, occupational class, and sickness absence during pregnancy: A retrospective analysis study of the Norwegian population registry**

|                                 |                                                                                        |
|---------------------------------|----------------------------------------------------------------------------------------|
| Journal:                        | <i>BMJ Open</i>                                                                        |
| Manuscript ID:                  | bmjopen-2013-004381                                                                    |
| Article Type:                   | Research                                                                               |
| Date Submitted by the Author:   | 05-Nov-2013                                                                            |
| Complete List of Authors:       | Ariansen, Anja Maria; The University of Bergen, Department of sociology                |
| <b>Primary Subject Heading</b>: | Occupational and environmental medicine                                                |
| Secondary Subject Heading:      | Public health, Health policy, Epidemiology                                             |
| Keywords:                       | REPRODUCTIVE MEDICINE, PUBLIC HEALTH, OCCUPATIONAL & INDUSTRIAL MEDICINE, EPIDEMIOLOGY |
|                                 |                                                                                        |

SCHOLARONE™  
Manuscripts

Peer review only

1  
2  
3  
4  
5  
6  
7 **Age, occupational class, and sickness absence during**  
8 **pregnancy: A retrospective analysis study of the Norwegian**  
9 **population registry**  
10  
11  
12  
13  
14  
15  
16  
17  
18  
19  
20

21 Corresponding author: Anja MS Ariansen<sup>1</sup>  
22

23 <sup>1</sup>Department of Sociology, University of Bergen, Norway  
24  
25  
26  
27  
28  
29  
30  
31  
32  
33  
34  
35  
36  
37  
38  
39  
40  
41  
42  
43  
44  
45  
46  
47  
48  
49  
50  
51  
52  
53  
54  
55  
56  
57  
58  
59  
60

## Abstract

### Objective:

Western women increasingly delay having children to advance their career, and pregnancy is considered to be riskier among older women. In Norway, this development somewhat surprisingly coincides with increased sickness absence among young pregnant women, rather than their older counterparts. This paper tests the hypothesis that the negative association between age and sickness absence is due to class differentials in the timing of pregnancy.

### Design:

A zero-inflated Poisson regression was conducted on the Norwegian population registry.

### Participants:

All pregnant employees giving birth in 2004-2008 were included in the study. A total number of 216 541 pregnancies were observed among 180 483 women.

### Outcome measure:

Days of sickness absence

### Results:

Among women undergoing their first pregnancy, the negative association between age and sickness absence became statistically insignificant when occupational class was controlled for

1  
2  
3 (p>0.05, 95% CI -0.001 to 0.001). This was not the case for women with previous deliveries,  
4  
5 who still had a significant, negative effect of age after control for class (p<0.001, 95% CI -0.006  
6  
7 to -0.004).  
8  
9

### 10 11 12 13 **Conclusion:**

14  
15  
16 The higher frequency of sickness absence among young pregnant women is partly due to class  
17  
18 differentials in timing of pregnancy. Young pregnant women's needs for job adjustments should  
19  
20 not be underestimated.  
21  
22

### 23 24 25 26 **Strengths and limitations of the study**

- 27  
28 • Retrospective analyses of a population registry reveal that heightened sickness  
29  
30 absence among young, pregnant women in Norway is partly due to class differentials  
31  
32 in timing of pregnancy.  
33  
34
- 35  
36 • The data employed include information about all employees giving birth in 2004-  
37  
38 2008, thus the risks of Type I and Type II errors are eliminated.  
39  
40
- 41  
42 • The data consist of official recordings, which make sure that the estimates do not  
43  
44 suffer from bias due to self-reporting or non-response.  
45  
46
- 47  
48 • Although occupational class has a major impact on sickness absence among pregnant  
49  
50 women in this study, the data do not allow for assessing the relative contribution of  
51  
52 working conditions.  
53  
54
- 55  
56 • Age differentials among pregnant women with previous deliveries remain  
57  
58 unexplained.  
59  
60

## Objective

Western women increasingly delay having children to advance their career [1], and pregnancy is normally regarded as being riskier among older women [2]. In Norway, this development coincides with increased sickness absence during pregnancy. Somewhat surprisingly, the increased sickness absence primarily applies to young pregnant women rather than their older counterparts [3].

Previous research has revealed that sickness absence during pregnancy is influenced by the pregnant women's work place, both through adjustments and social interaction with colleagues [4 5]. This paper broadens the scope of this literature by emphasising how the women's work place is also influenced by recent shifts in fertility and employment patterns. Age during pregnancy has become increasingly linked to education and occupation [1]. The aim of this paper is to examine if the heightened sickness absence among young pregnant women in Norway is due to a preponderance of working class women in this group.

## Background and significance

Because the Norwegian sickness benefit is very generous, growing levels of sickness absence have created concern about future public costs [6]. In this context, more frequent sickness absence among young pregnant women may easily be seen as a reflection of unsustainable welfare consumption in younger generations. Such speculation is problematic, because pregnant women may respond to other's negative views on them with risky behavior [7]. This highlights

1  
2  
3 the importance of ensuring that heightened sickness absence among young pregnant women is  
4  
5 addressed through empirical investigation rather than unsound generalisations.  
6  
7

8 Although female employment is facilitated by most welfare states, Norway has been in the  
9  
10 forefront of this development [8]. If heightened sickness absence among young pregnant women  
11  
12 in Norway is an unintended side effect of women's growing engagement with career building,  
13  
14 other western welfare states may expect similar patterns of inequality in the future.  
15  
16

17 Shift work and physical strain in terms of lifting or standing is associated with preterm birth  
18  
19 [9 10]. Heavy lifting, as well as exposure to certain chemicals, also increases the risk for  
20  
21 miscarriage and decreased birth weight [11-13]. The importance of working conditions has also  
22  
23 been emphasised in previous research on sickness absence among pregnant women. Physical  
24  
25 strain increases sickness absence [14 15], while the opportunity for job adjustments reduces  
26  
27 sickness absence [5 16].  
28  
29  
30

31 Moreover, pregnant employees express that they strive to meet those standards of bodily  
32  
33 control and appearance that are expected at their workplace [4 17]. These accounts highlight the  
34  
35 need for adjustments such as breaks and permission to work from home. The "illness flexibility  
36  
37 model," emphasises how working conditions such as adjustment opportunities and reduced  
38  
39 requirement for physical presence enhance the possibility of continuing to work in spite of health  
40  
41 problems. A Swedish study explained lower rates of sickness absence among higher-ranking  
42  
43 employees in terms of such adjustment opportunities [18]. Other studies have also found that  
44  
45 working conditions explain some of the class differentials in sickness absence [19 20].  
46  
47  
48  
49

50 Class is also related to both sickness absence and pregnancy through norms and values. A  
51  
52 study from Finland suggests that differences in sickness absence were due to a "working class  
53  
54 culture" in which sickness absence is regarded as more legitimate [21: 1227]. Working in a  
55  
56  
57  
58  
59  
60

1  
2  
3 female-dominated work-place tend to slightly increase women's sickness absence in Norway,  
4  
5 which might be due to gender specific norms [22]. As gender segregation is stronger in the  
6  
7 working classes [23], such norms might enhance class differentials in sickness absence among  
8  
9 women.  
10

11  
12 Working-class women are more likely to express family-oriented values, while middle-class  
13  
14 women are more often characterised by occupational dedication [24]. Accordingly, part-time  
15  
16 work and housewifery are more widespread among working-class people [25]. However, an  
17  
18 apparent association between family orientations and sickness absence may also be health  
19  
20 related, because housewives tend to have more health problems than employed women [26]. To  
21  
22 the extent that early pregnancy indicates future housewifery, this could thus be a choice born of  
23  
24 necessity rather than a preference for women with health problems.  
25  
26  
27  
28

29  
30 Finally, postponed first birth is associated with a shorter duration between the first and second  
31  
32 birth [27: 157], suggesting that the age differentials among women of different classes may be  
33  
34 larger among first-time mothers than among women who have previously given birth. This leads  
35  
36 to the following hypotheses:  
37  
38

39  
40 H1: The negative association between age and sickness absence among pregnant  
41  
42 women is more pronounced among pregnant women undergoing their first  
43  
44 pregnancies than among pregnant women who have previously given birth.  
45  
46

47  
48 H2: The negative association between age and sickness absence becomes statistically  
49  
50 insignificant when occupational class is controlled for, both among first-time  
51  
52 pregnant women and those who have previously given birth.  
53  
54  
55  
56

## Materials and Methods

The following analyses are based on data collected by the Norwegian Labour and Welfare Administration, the Norwegian Tax Administration and the Ministry of Health and Care Services. The national agency Statistics Norway of the Ministry of Finance has adapted the data for research. The collected data include information about each individual of the entire Norwegian population. Use of population data from public records ensures that our estimates are not biased by non-response or self-reporting. Furthermore, the risk of type I or type II errors is eliminated because the analyses are based on data from the population rather than from a random sample.

The generous sickness benefit provisions in Norway ensure that most employees listed as sick receive full wage compensation for an entire calendar year. The pay-out has an upper limit which in 2008 amounted to NOK 414 648, or about EUR 52 799. Separate rules for sickness absence apply to self-employed, which makes comparison with employees difficult. For this reason self-employed women were excluded from our analyses.

For non-pregnant employees, the employer covers the first 16 calendar days of sickness absence, whereas National Insurance covers the rest of the period. This was also the rule for pregnant employees until 2001. Since 2002, employers can request reimbursement from National Insurance for expenditure on sickness absence among pregnant employees suffering periods of illness with a pregnancy-related diagnosis. This implies that the first 16 days are left censored for some spells, while other spells are complete. For women in general, approximately 32% of sickness absence is covered by the employer [28], but given the abovementioned amendment, the corresponding figure for pregnant women is probably smaller.



1  
2  
3 Each woman's value of the dependent variable *Sickness absence* equals the total number of days  
4 of absence covered for which she received the National Insurance sickness benefit in the 282  
5 days preceding birth. The variable also includes spells of absence covered by the pregnancy  
6 benefit, which are certified by physicians if they consider the pregnant woman's tasks or  
7 working environment to threaten the foetus. In order to prevent registration errors from turning  
8 into influential outliers, the variable *Sickness absence* was limited to an upper value. When  
9 weekends and holidays are taken into account, 248 is the maximum number of days for which  
10 compensation may be received during one calendar year for full-time employees, which equals  
11 68% of all calendar days in this period. The maximum value of days of sickness absence during  
12 pregnancy is correspondingly limited to 68% of the total pregnancy period of 282 days, or a  
13 maximum value of 192 days of sickness absence during pregnancy.  
14  
15  
16  
17  
18  
19  
20  
21  
22  
23  
24  
25  
26  
27  
28

29 A pregnancy period of 282 days is equal to the expected gestational age, which is counted from  
30 the first day of the last menstrual period prior to conception, and extends the period from  
31 conception to birth by 14 days. Norwegian health professionals frequently refer to gestational  
32 age as a measure of pregnancy duration when consulting women who are or plan to become  
33 pregnant, possibly increasing their awareness of symptoms even prior to conception. Because  
34 this awareness may influence sickness absence behaviour, the categorisation of sickness absence  
35 during pregnancy was based on expected gestational age.  
36  
37  
38  
39  
40  
41  
42  
43  
44  
45

46 From 2003 and onwards, registration of employment in the population data was improved  
47 because variables containing occupational codes and contracted working hours were included.  
48 Most of the women who gave birth in 2003 became pregnant in 2002, and thus lack relevant  
49 information from the first part of their pregnancy. For this reason the statistical analyses are  
50  
51  
52  
53  
54  
55  
56  
57  
58  
59  
60

1  
2  
3 limited to the years 2004-2008, as data for the years after 2008 are not yet accessible for  
4  
5 research.  
6

7  
8 In the data, registration of occupation follows the four-digit occupational code scheme  
9  
10 “Standard for yrkesklassifisering” (STYRK), which is a Norwegian version of the International  
11  
12 Standard Classification of Occupations (ISCO-88). The occupational codes in the registry data  
13  
14 were grouped according to the class scheme of Eriksson, Goldthorpe and Portocarero (EGP). On  
15  
16 direct request, a detailed manual for this categorisation was most kindly provided by Magne  
17  
18 Flemmen [29]. Utilisation of the EGP class scheme ensures international comparability [30 31]  
19  
20 and the class scheme has also shown a consistent association with health inequality [32 33],  
21  
22 which makes it suited when investigating sickness absence.  
23  
24  
25

26  
27 The class scheme is described by Erikson, Goldthorpe and Portocarero as clusters of  
28  
29 occupations with similar relations to the labour market. The separation of occupations into  
30  
31 different occupation does not necessarily imply hierarchical differences between them [34: 420].  
32  
33 The analyses presented in this article employs a later version of the EGP-class scheme [35, p. 38-  
34  
35 39], which soon will be outlined in the variable list. The classes which only contain self-  
36  
37 employed were omitted from the analyses, because a separate sickness benefit scheme applies to  
38  
39 this group, which makes comparison with employees difficult.  
40  
41  
42

43  
44 The variable *Previous deliveries* indicates whether a woman is registered as having given  
45  
46 birth since 1 January 1992. This categorisation is because the registration of births does not start  
47  
48 until that date, and necessarily implies an underestimation of the number of previous births for  
49  
50 women who first delivered prior to 1992. However, even for women giving birth in 2004 this  
51  
52 difference of more than 12 years between subsequent births of the same mother is rare. Thus, the  
53  
54 bias resulting from any misclassifications is limited.  
55  
56

1  
2  
3 Previous research indicates that the association between pregnant women's age and their  
4 occupation may be more pronounced during first pregnancies than subsequent ones [36]. The  
5 product of the variables *Age* and *Previous deliveries* is included in the regression analyses to  
6 account for such interactions.  
7  
8  
9

10  
11 All estimates are adjusted for possible confounders in terms of calendar year, weekly working  
12 hours, timing of transition to parental leave, and marital status, but for simplicity these control  
13 variables were left out of the analysis.  
14  
15  
16  
17

18 The variable *Calendar year* consists of a set of dummy variables, and was included to ensure that  
19 the estimated associations between age and occupational class do not reflect annual fluctuations  
20 in the work stock.  
21  
22  
23  
24  
25

26 The control variables *Working hours* and *Leave* were included to ensure that the association  
27 between pregnant women's age and their sickness absence do not simply reflect differences in  
28 working hours and/or timing of maternal leave among women different age groups. The value of  
29 the variable *Working hours* corresponds to the registered average number of hours worked by a  
30 woman in each week of employment during pregnancy. According to Norwegian Law, 40  
31 weekly working hours is the standard for full-time employees, but due to collective bargaining  
32 agreements most full-time employees rather have 37.5 weekly working hours. Although  
33 contracts may include overtime, the variable was constructed so that 40 is the upper limit in  
34 order to prevent outliers in cases where incomplete registration of previous employment entailed  
35 artificially high numbers of working hours. The *Leave* variable indicates the number of days  
36 between onset of pregnancy and either transition to maternity leave or date of delivery.  
37  
38  
39  
40  
41  
42  
43  
44  
45  
46  
47  
48  
49  
50  
51

52 The control variable *Marital status* was included to ensure that the association between age  
53 and sickness absence does not stem from differences in marital status. *Marital status* is measured  
54  
55  
56

1  
2  
3 at the end of the calendar year that the woman became pregnant and consists of a set of dummy  
4 variables. Over recent decades, cohabitation has become more widespread in Norway, even  
5  
6 among couples with children [37]. However, registration of marital status does not distinguish  
7  
8 cohabiting from single pregnant women.  
9  
10

11  
12  
13  
14  
15 Thus, the following variables are included in the Results section:  
16

- 17 • *Sickness absence*. Continuous dependent variable, the natural logarithm of the pregnant  
18 woman's number of sickness absence days covered by the National Insurance scheme;  
19  
20
- 21 • *Age*. Continuous independent variable. The age of the pregnant woman;  
22  
23
- 24 • *Occupational class*. Dummy set of independent variables. Reference group: *I Higher*  
25 *professionals*. Other categories: *II Lower professionals, IIIa Higher routine, IIIb Lower*  
26 *routine, V Technicians, VI Skilled, VII Semi- and unskilled, VIIb Agricultural, Missing*;  
27  
28
- 29 • *Previous deliveries*. Independent dummy variable. Women with previous deliveries take  
30 the value of 1. Women who undergo their first pregnancy take the value of 0;  
31  
32
- 33 • *Age × Previous deliveries*. Independent interaction variable equaling the value of *Age*  
34 multiplied by the value of *Previous deliveries*;  
35  
36
- 37 • *Year*. Dummy set of control variables. Reference group: Women giving birth in 2004.  
38 Other categories: *Year 2005, Year 2006, Year 2007, Year 2008*;  
39  
40
- 41 • *Working hours*. Continuous control variable. Average number of hours of paid work per  
42 week;  
43  
44  
45  
46  
47  
48  
49  
50  
51  
52  
53  
54  
55  
56  
57  
58  
59  
60

- *Leave*. Continuous control variable. Total number of days between pregnancy onset and either transition to parental leave or date of delivery;
- *Marital status*. Dummy set of independent variables. Reference group: *Unmarried*. Other categories: *Married, Divorced, Widowed*.

## Methods

After deleting 2537 deliveries with unknown mothers, a total number of 286 104 deliveries were registered during the observed period 2004-2008. The aim of the paper is to address the occupational challenges among young pregnant women rather than the particular difficulties associated with teen age pregnancies, thus 1473 teenage pregnancies were excluded from the analyses. Further 30 of the registered deliveries were excluded due to missing value on the variable *Age*, and 168 554 due to lack of registration of the woman's marital status. Of the remaining pregnancies, a total number of 216 541 met the inclusion criteria that the pregnant woman had registered earnings the year of delivery, and had worked at least 1 hour per week on average during the employed period of pregnancy. Of these, 16 286 have missing values on the variable of occupational class. A separate dummy variable for these observations was added to the set of dummy variables which occupational class consists of. About 0.6% of the registered sickness absence spells were excluded from the analyses due to missing value on the variable of compensated days of sickness absence.

As some women underwent more than one of the registered pregnancies, a total number of 180 483 individuals are included in the analyses. Pregnancies applying to the same woman are

1  
2  
3 treated as different observations in the analysis, thus the total number of observations is 216 541.  
4  
5 However, robust standard errors are utilized in the calculations of confidence intervals and p-  
6  
7 values, to account for correlation of observations in cases where one woman has undergone more  
8  
9 than one of the observed pregnancies.  
10  
11

12 The dependent variable in the following analyses can be characterised as count data, because  
13  
14 it represents the total number of sickness absence days and thus only contains positive integer  
15  
16 values. Furthermore, the dependent variable indicates a large proportion of women with the  
17  
18 value of 0, which supports the use of a zero-inflated Poisson regression model (zip model). A  
19  
20 significant Vuong test also indicates that the zip model fits the data better than the standard  
21  
22 Poisson model.  
23  
24  
25

26 The zip model consists of two components, because the predicted value of *Sickness absence* is  
27  
28 combined with a prediction of the probability of achieving a value of zero. The coefficients for  
29  
30 the first prediction indicate the change in the log of the expected days of sickness absence, rather  
31  
32 than expected days of sickness absence directly. Consequently, each regression coefficient  
33  
34 reveals changes in the log of the expected value of sickness absence produced by a one-unit  
35  
36 increase in a given variable when other independent variables are held constant. Because the  
37  
38 substantial meaning of the coefficients is not readily apparent, marginal plots will be provided  
39  
40 for the core findings.  
41  
42  
43  
44

45 In the second component of the zip model, the variables *Working hours* and *Leave* are used as  
46  
47 predictors of values exceeding zero in all four regression models. This indicates that the inflation  
48  
49 of 0 days of sickness absence is partly due to inclusion of employees with few contracted  
50  
51 working hours and/or early transition to parental leave, which reduces the possible number of  
52  
53 sick days.  
54  
55  
56

In analyses of samples drawn from a population, the purpose of significance testing is to assess the likelihood that the estimates that apply to the sample also apply to the population as a whole. For analyses based on a population rather than a sample drawn from it, this condition is already satisfied. Nevertheless, use of significance testing may be appropriate to distinguish between correlations that reflect actual conditions in the population and those that simply reflect the possible occurrence of small natural variations across time and space despite support for a true null hypothesis [38]. For this reason, significance testing is included in the following regression models.

## Results

Table 1 shows that the pregnant women included in the analyses on average have 46.8 days of sickness absence compensated from the National Insurance during pregnancy, although the large standard deviation indicates that the variation is large. The average pregnant employee is about 30 years old, works almost 30 working hours per week, and goes on maternal leave about 18 days prior to delivery. More than half of the pregnancies occur among women who have had previous deliveries, and more than half of the pregnant women belong to one of the two occupational classes *IIIa Higher Routine* and *II Lower professionals*. Most of the pregnant women are either unmarried or married. The number of pregnant employees increases slightly each year throughout the observed period.

**Table 1.** Descriptive statistics.

| Continuous variables | Mean | St. Dev. |
|----------------------|------|----------|
| Sickness absence     | 46.8 | 48.46    |
| Age                  | 30.6 | 4.8      |

|                              |                         |                   |
|------------------------------|-------------------------|-------------------|
| Working hours                | 29.5                    | 10.8              |
| Leave                        | 17.9                    | 10.9              |
| <b>Categorical variables</b> | <b>Category</b>         | <b>Percentage</b> |
| Previous births              | First pregnancy         | 46.0              |
|                              | Previous births         | 54.0              |
| Occupational class           | I Higher professionals  | 8.9               |
|                              | II Lower professionals  | 21.4              |
|                              | IIIa Higher routine     | 33.6              |
|                              | IIIb Lower routine      | 16.5              |
|                              | V Technicians           | 0.2               |
|                              | VI Skilled              | 2.9               |
|                              | VII Semi- and unskilled | 8.7               |
| Marital status               | VIIb Agricultural       | 0.4               |
|                              | Missing                 | 7.5               |
|                              | Unmarried               | 51.05             |
|                              | Married                 | 44.42             |
| Year                         | Divorced                | 4.44              |
|                              | Widowed                 | 0.09              |
|                              | 2004                    | 19.4              |
|                              | 2005                    | 19.1              |
|                              | 2006                    | 19.8              |
| Total number of observations | 2007                    | 20.3              |
|                              | 2008                    | 21.3              |
|                              |                         | 216 541           |

Table 2 shows a zero-inflated Poisson regression, which includes two components. The Count component is a prediction of Sickness absence, and Models 1-4 show the varying associations that follow from different sets of independent variables. The Zero excess component predicts the probability of taking no sick days after control for *Working hours* and *Leave*, and remains unchanged in all four models. Table 2 lists a high number of coefficients which are statistically significant at the predefined significance level of 1%, a situation that is quite common when analysing population data. The Count component of Model 1 shows the unadjusted association between *Age* and *Sickness absence*, while Models 2-4 are adjusted for confounders.

**Table 2.** Zero-inflated Poisson regression with days of sickness absence as the dependent variable. The coefficients in the Count component are adjusted for Working hours, Leave, Year



1  
2  
3 and Marital status in Models 2-4. The coefficients of the Excess zero component are adjusted for  
4  
5  
6 *Working hours* and *Leave* in all four models.  
7  
8  
9  
10  
11  
12  
13  
14  
15  
16  
17  
18  
19  
20  
21  
22  
23  
24  
25  
26  
27  
28  
29  
30  
31  
32  
33  
34  
35  
36  
37  
38  
39  
40  
41  
42  
43  
44  
45  
46  
47  
48  
49  
50  
51  
52  
53  
54  
55  
56  
57  
58  
59  
60

For peer review only

|                              | Model 1                        | Model 2                        | Model 3                        | Model 4                        |
|------------------------------|--------------------------------|--------------------------------|--------------------------------|--------------------------------|
| <b>Count component</b>       |                                |                                |                                |                                |
| Age                          | -0.001***<br>(-0.002 - -0.001) | -0.004***<br>(-0.005 - -0.003) | -0.005***<br>(-0.006 - -0.003) | -0.00002<br>(-0.001 - 0.001)   |
| Previous deliveries          |                                |                                | 0.276***<br>(0.228 - 0.323)    | 0.261***<br>(0.214 - 0.307)    |
| Age x Previous deliveries    |                                |                                | -0.005***<br>(-0.007 - -0.004) | -0.005***<br>(-0.007 - -0.004) |
| II Lower professionals       |                                |                                |                                | 0.054***<br>(0.038 - 0.071)    |
| IIIa Higher routine          |                                |                                |                                | 0.184***<br>(0.169 - 0.200)    |
| IIIb Lower routine           |                                |                                |                                | 0.243***<br>(0.226 - 0.259)    |
| V Technicians                |                                |                                |                                | 0.069<br>(-0.015 - 0.153)      |
| VI Skilled                   |                                |                                |                                | 0.215***<br>(0.191 - 0.240)    |
| VIIa Semi- and unskilled     |                                |                                |                                | 0.287***<br>(0.268 - 0.306)    |
| VIIb Agricultural            |                                |                                |                                | 0.203***<br>(0.143 - 0.263)    |
| Missing                      |                                |                                |                                | 0.107***<br>(0.088 - 0.127)    |
| Constant                     | 4.227***<br>(4.204 - 4.250)    | 3.148***<br>(3.052 - 3.244)    | 3.102***<br>(3.002 - 3.201)    | 2.768***<br>(2.668 - 2.868)    |
| <b>Excess zero component</b> |                                |                                |                                |                                |
| Constant                     | -1.341***<br>(-1.593 - -1.088) | -1.341***<br>(-1.593 - -1.088) | -1.341***<br>(-1.593 - -1.088) | -1.341***<br>(-1.593 - -1.088) |
| Observations                 | 216 541                        | 216 541                        | 216 541                        | 216 541                        |
| Cragg & Uhler's R2:          | 0.021                          | 0.178                          | 0.278                          | 0.457                          |

Robust confidence intervals in parentheses

\*\*\* p<0.01, \*\* p<0.05, \* p<0.1

Model 1 reveals a significant negative coefficient for *Age*. This implies that the average level of sickness absence is higher among young women than among those of higher age before control for confounders. The negative association between age and sickness absence is further enhanced by control for the confounders *Year*, *Working hours*, *Leave*, and *Marital status*, as shown in Model 2.

1  
2  
3 In Model 3, the variable *Previous deliveries* and the product of *Age* and *Previous deliveries* is  
4 included to measure interaction effects. The significant coefficient confirms that different  
5 associations between age and sickness absence applies to women with and without previous  
6 birth(s). Since the interpretation of the interaction coefficients is complicated, the interaction  
7 effect is illustrated in Figure 1. However, it is worth noticing that in Model 3, the negative *Age*  
8 coefficient is still statistically significant. As age is one of the variables included in the  
9 interaction term, a negative coefficient for age implies a negative association between age and  
10 sickness absence among women who have the value 0 on the other variable included in the  
11 interaction term, which in this case means pregnancies of women undergoing their first  
12 pregnancy.  
13  
14  
15  
16  
17  
18  
19  
20  
21  
22  
23  
24  
25  
26

27 The coefficient of *Age* is no longer statistically significant when occupational class is  
28 controlled for, as shown in Model 4. Among women undergoing their first pregnancy, there is  
29 thus no significant association between age and sickness absence after control for class.  
30  
31 However, the significant interaction term suggest that this is not the case for women with  
32 previous deliveries. The implications of this change are illustrated in Figure 1. Except from *V*  
33 *Technicians*, all the occupational classes have positive and statistically significant coefficients,  
34 indicating that each class has a higher level of sickness absence than the reference category,  
35 which is *I Higher professionals*.  
36  
37  
38  
39  
40  
41  
42  
43  
44  
45

46 Cragg and Uhler's R<sup>2</sup>, also referred to as Nagelkerke's R<sup>2</sup>, is a measure of model fit that  
47 varies between 0 and 1 [39]. High values indicate better prediction of counts in the current model  
48 than in the intercept model, which equals a model without independent variables. In Model 1, the  
49 value of Cragg and Uhler's R<sup>2</sup> is 0.021, which implies that controlling only for Age has a limited  
50 improvement of prediction of days of sickness absence. In Model 2 and Model 3 the values of  
51  
52  
53  
54  
55  
56  
57  
58  
59  
60

1  
2  
3 Cragg and Uhler's R2 have increased to 0.178 and 0.278, which suggest that the prediction of  
4 sickness absence is substantially improved after controlling for the confounders, and further  
5 improved by control for previous births and the interactions of age and previous births. By  
6  
7  
8  
9  
10 control for occupational class in Model 4, the value increases to 0.457, thus prediction of  
11  
12 sickness absence is considerably improved when occupational class is included in the model.  
13  
14

15 Figure 1 displays the various associations between age and days of sickness absence in the  
16 preceding regression models. As the graph for Model 1 indicates, sickness absence is negatively  
17 associated with age. Before control for any covariates, pregnant women aged 20 on average have  
18 47,78 days of sickness absence during pregnancy, while the corresponding number for pregnant  
19 women aged 45 is 46,06. The former group thus have 1.72 more days of sickness absence than  
20 the latter. This difference increases to 4.42 after control for the relevant confounders Calendar  
21 year, Working hours, Leave and Marital status, as revealed in the second graph, Model 2.  
22  
23  
24  
25  
26  
27  
28  
29  
30

31 The interaction of previous deliveries and age is illustrated in the third graph, Model 3. The  
32 negative association between age and sickness absence is most pronounced among pregnant  
33 women with previous deliveries. Among first-time pregnant women, 20 year-olds have 46.46  
34 days of absence while 45 year-olds have 41.37. Among pregnant women with previous births,  
35 the corresponding numbers are 54.95 and 42.76.  
36  
37  
38  
39  
40  
41  
42  
43  
44

45 Finally, the last graph shows that among first-time pregnant women, the negative association  
46 between age and sickness absence levels out after control for occupational class. Although first-  
47 time pregnant women aged 20 have on average 43.99 days of sickness absence, while those aged  
48 45 have 43.96, these differences are not statistically significant. Among pregnant women with  
49 previous births, the association is weakened but still negative after control for class. In this  
50  
51  
52  
53  
54  
55  
56  
57  
58  
59  
60

1  
2  
3 category, 20 year-old women have on average 51.48 days of sickness absence and 45 year-olds  
4  
5 have 45.20.  
6  
7  
8  
9

## 10 **Discussion**

11  
12 The preceding analyses have shown that among women undergoing their first pregnancies, the  
13  
14 higher sickness absence among employees of young age is due to a preponderance of working  
15  
16 class occupations in this group. Among first-time mothers, the initial association between age  
17  
18 and sickness absence is thus due to class differentials in timing of pregnancy. Among pregnant  
19  
20 women with previous births, young employees still have higher sickness absence after control for  
21  
22 class, although the association between age and sickness absence is slightly weakened. A  
23  
24 majority of the heightened sickness absence among young pregnant women in this group is thus  
25  
26 not explained by class differentials in timing of pregnancy. Since the analyses are conducted on  
27  
28 data from a population rather than a sample, the results necessarily apply to the population as  
29  
30 well.  
31  
32  
33  
34  
35

36  
37 Since controlling for occupational class implies a weakening of the negative association  
38  
39 between age and sickness absence both among first-time pregnant women and women who have  
40  
41 previously given birth, the initial association is partly due to aspects of occupational class which  
42  
43 these two groups have in common. Unfortunately, the data set does not allow for a more detailed  
44  
45 causal analysis of class differentials, but previous research may hint at possible explanations of  
46  
47 the association between class, pregnancy and sickness absence which apply to both groups.  
48  
49 Manual work and night shifts are less compatible with pregnancy than are working conditions in  
50  
51 most middle-class occupations. The importance of flexible working conditions is also  
52  
53 highlighted among pregnant employees themselves and empirically verified by analyses of the  
54  
55  
56  
57  
58  
59  
60

1  
2  
3 “illness flexibility model”. Employees in working-class occupations are also less often rewarded  
4  
5 with promotions for faithful service. Sickness absence may be more legitimate among workers  
6  
7 than among middle-class employees, and working-class women are often more oriented toward  
8  
9 family building than employment. In summary, several aspects of the working environment and  
10  
11 the employees shape pregnant women’s opportunities for adjustments and probably also their  
12  
13 motivation to work in spite of their symptoms.  
14  
15

16  
17 However, class and family characteristics only explain a small proportion of the negative  
18  
19 association between age and sickness absence among women who had previously delivered. In  
20  
21 this group, higher levels of sickness absence apply to young pregnant women even after control  
22  
23 for occupational class. This result calls for an explanation.  
24  
25

26  
27 Pregnant employees’ own accounts, termed “*Strategies of Secrecy, Silence and Supra-*  
28  
29 *performance*” [4] may shed light on this picture. In short, these pregnant employees explain how  
30  
31 they strive to adapt to workplace norms of occupational performance by delaying the  
32  
33 announcement of their pregnancy, avoiding discussing it and compensating through increased  
34  
35 flexibility and longer working hours, to demonstrate to their employer that the pregnancy does  
36  
37 not make them less predictable or reliable as employees. Keeping sickness absence at an absolute  
38  
39 minimum is also part of these strategies. Although these strategies seem quite hazardous, they  
40  
41 also seem to reflect an important implicit assumption: employees do not want pregnancy to  
42  
43 jeopardise their occupational attachment. Thus, their efforts to reduce their sickness absence  
44  
45 during pregnancy probably reflect a general orientation toward future employment.  
46  
47  
48  
49

50  
51 In contrast, early transition to second or third births may reflect weaker employment  
52  
53 orientation, especially since Norwegian women less frequently return to full-time employment  
54  
55 after second or third births [40]. Accordingly, the association between high levels of sickness  
56  
57

1  
2  
3 absence and early transition to second or third births that we find in our analyses may indicate  
4  
5 that the threshold for sickness absence is lower for women whose future prospects are oriented  
6  
7 toward family building rather than employment. However, the well-known association between  
8  
9 homemaking and health problems implies that the apparent family orientation indicated by early  
10  
11 transition to second or third births may reflect health problems rather than preferences.  
12  
13

14  
15 Finally, early transition to second or third births occurs much less frequently in Norway today  
16  
17 than just a few decades ago. Sickness absence among women who undertake such transitions  
18  
19 should thus be regarded in the light of the possible atypical situation of these women, because  
20  
21 they may be affiliated with ethnic or religious groups that influence their sickness absence.  
22  
23

## 24 25 26 27 **Conclusion**

28  
29 Young pregnant women have higher frequency of sickness absence than their older counterparts.  
30  
31 Contrary to expectations, the age differentials in sickness absence are stronger among pregnant  
32  
33 women with previous deliveries than among those undergoing their first pregnancies. Class  
34  
35 differentials in timing of pregnancy only account for the age differentials in the latter group.  
36  
37  
38  
39

## 40 41 42 **Author contributions**

43  
44 AMSA designed the study, conducted the analyses and wrote the paper.  
45  
46  
47  
48

## 49 50 51 **Funding and ethics**

52  
53 This work was supported by The University of Bergen, which had no influence on the content of  
54  
55 this article. The author has no conflicting interests. Use of the Norwegian population registry in  
56  
57

1  
2  
3 this project was approved by The Norwegian Data Protection Authority. No informed consent  
4  
5 was required, because the data were analysed anonymously. There is no additional data  
6  
7  
8 available.  
9

## 10 11 12 13 **Acknowledgements**

14  
15 Many thanks to Magne Flemmen and Patrick Andersen, who most kindly provided a detailed  
16  
17 manual for categorising Norwegian occupations in accordance with the class scheme of  
18  
19 Eriksson, Goldthorpe and Portocarero. Any possible errors in the analyses are of course my own.  
20  
21 Thanks to my supervisor Prof. Hans-Tore Hansen for suggestions and feedback, and to Dr.  
22  
23 Øystein Ariansen Haaland for statistical advice. Thanks also to Bo Vignes, Dr. Miia Bask, Gisle  
24  
25 Andersen, Prof. Em. Kari Wærness, and Prof. Arne Kalleberg for useful comments on the paper.  
26  
27  
28  
29  
30  
31

## 32 33 **References**

- 34 1. Mills M, Rindfuss RR, McDonald P, et al. Why do people postpone parenthood? Reasons and  
35 social policy incentives. *Human Reproduction Update* 2011;848-60 doi:  
36 10.1093/humupd/dmr026[published Online First: Epub Date]].
- 37 2. Duckitt K, Harrington D. Risk factors for pre-eclampsia at antenatal booking: systematic  
38 review of controlled studies. *British Medical Journal* 2005;330(7491):565-67
- 39 3. Markussen S, Røgeberg O. Sykefravær rundt større livshendelser [Sickness absence due to life  
40 events]. *Tidsskrift for Den norske legeförening* 2012;132:1231-34
- 41 4. Gatrell C. Policy and the Pregnant Body at Work: Strategies of Secrecy, Silence and Supra-  
42 performance. *Gender, Work & Organization* 2011;18(2):158-81 doi: 10.1111/j.1468-  
43 0432.2009.00485.x[published Online First: Epub Date]].
- 44 5. Kristensen P, Nordhagen R, Wergeland E, et al. Job adjustment and absence from work in  
45 mid-pregnancy in the Norwegian Mother and Child Cohort Study (MoBa). *Occupational  
46 and Environmental Medicine* 2008;65(8):560-66 doi:  
47 10.1136/oem.2007.035626[published Online First: Epub Date]].
- 48 6. OECD. *OECD Economic Surveys: Norway 2007*: OECD Publishing, 2007.
- 49 7. Gatrell C. 'I'm a bad mum': Pregnant presenteeism and poor health at work. *Social Science &  
50 Medicine* 2011;72(4):478-85 doi: 10.1016/j.socscimed.2010.11.020[published Online  
51 First: Epub Date]].
- 52  
53  
54  
55  
56  
57  
58  
59  
60



- 1
- 2
- 3
- 4 8. Sümer S. *European gender regimes and policies: comparative perspectives*. Farnham:  
5 Ashgate, 2009.
- 6 9. Mozurkewich EL, Luke B, Avni M, et al. Working conditions and adverse pregnancy  
7 outcome: a meta-analysis. *Obstetrics & Gynecology* 2000;**95**(4):623-35
- 8 10. Bonzini M, Coggon D, Palmer KT. Risk of prematurity, low birthweight and pre-eclampsia  
9 in relation to working hours and physical activities: a systematic review. *Occupational  
10 and environmental medicine* 2007;**64**(4):228-43
- 11 11. Lindbohm M. Physical workload—a risk factor for miscarriage? *Scandinavian journal of  
12 work, environment & health* 2013
- 13 12. Jurewicz J, Hanke W, Makowiec-Dąbrowska T, et al. Exposure to pesticides and heavy work  
14 in greenhouses during pregnancy: does it effect birth weight? *International archives of  
15 occupational and environmental health* 2005;**78**(5):418-26
- 16 13. Burdorf A, Brand T, Jaddoe V, et al. The effects of work-related maternal risk factors on  
17 time to pregnancy, preterm birth and birth weight: the Generation R Study. *Occupational  
18 and Environmental Medicine* 2011;**68**(3):197-204
- 19 14. Kaerlev L, Jacobsen LB, Olsen J, et al. Long-term sick leave and its risk factors during  
20 pregnancy among Danish hospital employees. *Scandinavian Journal of Public Health*  
21 2004;**32**(2):111-17 doi: 10.1080/14034940310017517[published Online First: Epub  
22 Date]].
- 23 15. Strand K, Wergeland E, Bjerkedal T. Work load, job control and risk of leaving work by  
24 sickness certification before delivery, Norway 1989. *Scandinavian Journal of Social  
25 Medicine* 1997;**25**(3):193-201
- 26 16. Strand K, Wergeland E, Bjerkedal T. Job adjustment as a means to reduce sickness absence  
27 during pregnancy. *Scand. J. Work Environ. Health* 1997;**23**(5):378-84
- 28 17. Warren S, Brewis J. Matter over Mind? Examining the Experience of Pregnancy. *Sociology*  
29 2004;**38**(2):219-36 doi: 10.1177/0038038504040860[published Online First: Epub Date]].
- 30 18. Johansson G, Lundberg I. Components of the Illness Flexibility Model As Explanations of  
31 Socioeconomic Differences in Sickness Absence. *International Journal of Health Services*  
32 2009;**39**:123-38
- 33 19. North F, Syme S, Feeney A, et al. Explaining Socioeconomic Differences in Sickness  
34 Absence - the Whitehall-II Study. *British Medical Journal* 1993;**306**:361-66
- 35 20. Melchior M, Krieger N, Kawachi I, et al. Work Factors and Occupational Class Disparities in  
36 Sickness Absence: Findings From the GAZEL Cohort Study. *Americal Journal of Public  
37 Health* 2005;**95**:1206-12
- 38 21. Virtanen P, Vahtera J, Nakari R, et al. Economy and job contract as contexts of sickness  
39 absence practices: revisiting locality and habitus. *Social Science & Medicine*  
40 2004;**58**(7):1219-29
- 41 22. Mastekaasa A. Sickness absence in female- and male-dominated occupations and  
42 workplaces. *Social Science & Medicine* 2005;**60**(10):2261-72 doi:  
43 10.1016/j.socscimed.2004.10.003[published Online First: Epub Date]].
- 44 23. Ellingsaeter AL. Scandinavian welfare states and gender (de)segregation: Recent trends and  
45 processes. *Economic and Industrial Democracy* 2013;**0**:1-18 doi:  
46 10.1177/0143831x13491616[published Online First: Epub Date]].
- 47 24. Duncan S, Irwin S. The social patterning of values and rationalities: mothers' choices in  
48 combining caring and employment. *Social Policy and Society* 2004;**3**(4):391-99
- 49
- 50
- 51
- 52
- 53
- 54
- 55
- 56
- 57
- 58
- 59
- 60

- 1  
2  
3  
4  
5  
6  
7  
8  
9  
10  
11  
12  
13  
14  
15  
16  
17  
18  
19  
20  
21  
22  
23  
24  
25  
26  
27  
28  
29  
30  
31  
32  
33  
34  
35  
36  
37  
38  
39  
40  
41  
42  
43  
44  
45  
46  
47  
48  
49  
50  
51  
52  
53  
54  
55  
56  
57  
58  
59  
60
25. Lewis J. The decline of the male breadwinner model: implications for work and care. *Social Politics* 2001;**8**(2):152-69
  26. Annandale E, Hunt K. *Gender inequalities in health*. Berkshire: Open University Press Buckingham, 2000.
  27. Rønsen M. Fertility and public policies-Evidence from Norway and Finland. *Demographic Research* 2004;**10**(6):143-70
  28. Bjerkedal T, Thune O. Hva koster sykelønnsordningen [What are the costs of the sickness benefit]. *Tidsskrift for Den norske legeforening* 2003;**123**:662-3
  29. Flemmen MaA, P.L. . Implementering av EGP classeskjema for norske registerdata [Implementation of the class scheme of Eriksson, Golthorpe and Portocarero on Norwegian register data]. Oslo: Institutt for sosiologi og samfunnsgeografi, Universitetet i Oslo, 2009.
  30. Krokstad S, Westin S. Health inequalities by socioeconomic status among men in the Nord-Trøndelag Health Study, Norway. *Scandinavian Journal of Public Health* 2002;**30**(2):113-24 doi: 10.1177/14034948020300020501[published Online First: Epub Date]].
  31. Cavelaars AE, Kunst AE, Geurts JJ, et al. Morbidity differences by occupational class among men in seven European countries: an application of the Erikson-Goldthorpe social class scheme. *International Journal of Epidemiology* 1998;**27**(2):222-30
  32. Muntaner C, Borrell C, Vanroelen C, et al. Employment relations, social class and health: A review and analysis of conceptual and measurement alternatives. *Social Science & Medicine* 2010;**71**(12):2130-40 doi: <http://dx.doi.org/10.1016/j.socscimed.2010.09.038>[published Online First: Epub Date]].
  33. Bartley M, Carpenter L, Dunnell K, et al. Measuring inequalities in health: an analysis of mortality patterns using two social classifications. *Sociology of Health & Illness* 1996;**18**(4):455-75 doi: 10.1111/1467-9566.ep10939068[published Online First: Epub Date]].
  34. Erikson R, Goldthorpe JH, Portocarero L. Intergenerational class mobility in three Western European societies: England, France and Sweden. *The British Journal of Sociology* 1979;**30**(4):415-41
  35. Erikson R, Goldthorpe JH. *The constant flux: A study of class mobility in industrial societies*: Oxford University Press, USA, 1992.
  36. Lappegård T, Rønsen M. The Multifaceted Impact of Education on Entry into Motherhood. *European Journal of Population/Revue européenne de Démographie* 2005;**21**(1):31-49 doi: 10.1007/s10680-004-6756-9[published Online First: Epub Date]].
  37. Kiernan K. The rise of cohabitation and childbearing outside marriage in western Europe. *International Journal of Law, Policy and the Family* 2001;**15**(1):1-21 doi: 10.1093/lawfam/15.1.1[published Online First: Epub Date]].
  38. Hoem JM. The reporting of statistical significance in scientific journals. *Demographic Research* 2008;**18**:437-42
  39. Cragg JG, Uhler RS. The demand for automobiles. *The Canadian Journal of Economics/Revue canadienne d'Economie* 1970;**3**(3):386-406
  40. Rønsen M, Sundström M. Family policy and after-birth employment among new mothers—a comparison of Finland, Norway and Sweden. *European Journal of Population/Revue européenne de démographie* 2002;**18**(2):121-52

1  
2  
3  
4  
5  
6  
7 **Figure legends**  
8

9  
10 **Figure 1.** Marginal effect of age in Models 1 to 4 in the regression analysis.  
11  
12  
13  
14  
15  
16  
17  
18  
19  
20  
21  
22  
23  
24  
25  
26  
27  
28  
29  
30  
31  
32  
33  
34  
35  
36  
37  
38  
39  
40  
41  
42  
43  
44  
45  
46  
47  
48  
49  
50  
51  
52  
53  
54  
55  
56  
57  
58  
59  
60

For peer review only

1  
2  
3  
4  
5  
6  
7  
8  
9  
10  
11  
12  
13  
14  
15  
16  
17  
18  
19  
20  
21  
22  
23  
24  
25  
26  
27  
28  
29  
30  
31  
32  
33  
34  
35  
36  
37  
38  
39  
40  
41  
42  
43  
44  
45  
46  
47  
48  
49  
50  
51  
52  
53  
54  
55  
56  
57  
58  
59  
60

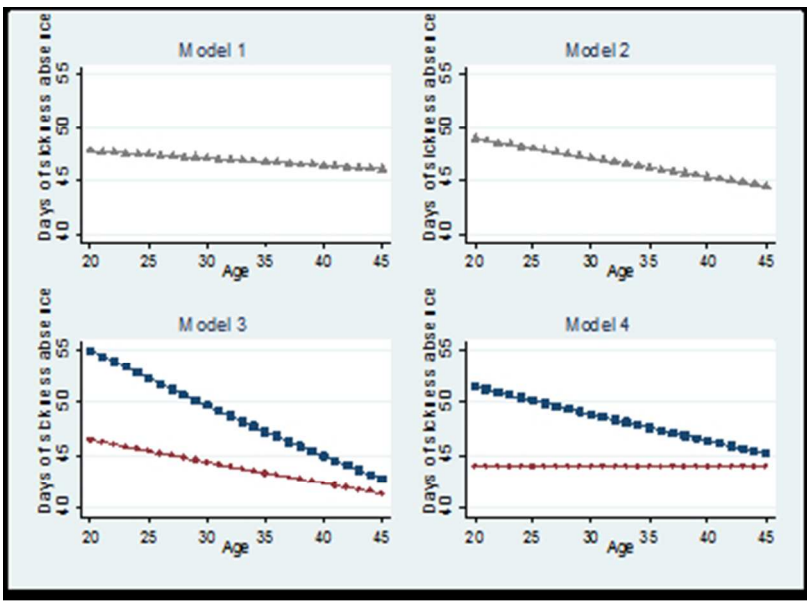

85x62mm (120 x 120 DPI)

review only

—▲— All pregnant women    —■— Previous birth(s)    —●— First birth

104x10mm (120 x 120 DPI)

For peer review only

1  
2  
3  
4  
5  
6  
7  
8  
9  
10  
11  
12  
13  
14  
15  
16  
17  
18  
19  
20  
21  
22  
23  
24  
25  
26  
27  
28  
29  
30  
31  
32  
33  
34  
35  
36  
37  
38  
39  
40  
41  
42  
43  
44  
45  
46  
47  
48  
49  
50  
51  
52  
53  
54  
55  
56  
57  
58  
59  
60

STROBE 2007 (v4) Statement—Checklist of items that should be included in reports of cohort studies

| Section/Topic             | Item # | Recommendation                                                                                                                                                                       | Reported on page # |
|---------------------------|--------|--------------------------------------------------------------------------------------------------------------------------------------------------------------------------------------|--------------------|
| Title and abstract        | 1      | (a) Indicate the study’s design with a commonly used term in the title or the abstract                                                                                               | 1                  |
|                           |        | (b) Provide in the abstract an informative and balanced summary of what was done and what was found                                                                                  | 2                  |
| <b>Introduction</b>       |        |                                                                                                                                                                                      |                    |
| Background/rationale      | 2      | Explain the scientific background and rationale for the investigation being reported                                                                                                 | 4-5                |
| Objectives                | 3      | State specific objectives, including any prespecified hypotheses                                                                                                                     | 6                  |
| <b>Methods</b>            |        |                                                                                                                                                                                      |                    |
| Study design              | 4      | Present key elements of study design early in the paper                                                                                                                              | 3                  |
| Setting                   | 5      | Describe the setting, locations, and relevant dates, including periods of recruitment, exposure, follow-up, and data collection                                                      | 7                  |
| Participants              | 6      | (a) Give the eligibility criteria, and the sources and methods of selection of participants. Describe methods of follow-up                                                           | 12                 |
|                           |        | (b) For matched studies, give matching criteria and number of exposed and unexposed                                                                                                  |                    |
| Variables                 | 7      | Clearly define all outcomes, exposures, predictors, potential confounders, and effect modifiers. Give diagnostic criteria, if applicable                                             | 8-11               |
| Data sources/ measurement | 8*     | For each variable of interest, give sources of data and details of methods of assessment (measurement). Describe comparability of assessment methods if there is more than one group | 8-11               |
| Bias                      | 9      | Describe any efforts to address potential sources of bias                                                                                                                            | 9-10               |
| Study size                | 10     | Explain how the study size was arrived at                                                                                                                                            | 12                 |
| Quantitative variables    | 11     | Explain how quantitative variables were handled in the analyses. If applicable, describe which groupings were chosen and why                                                         | 11-12              |
| Statistical methods       | 12     | (a) Describe all statistical methods, including those used to control for confounding                                                                                                | 12-13              |
|                           |        | (b) Describe any methods used to examine subgroups and interactions                                                                                                                  | 10                 |
|                           |        | (c) Explain how missing data were addressed                                                                                                                                          | 12                 |
|                           |        | (d) If applicable, explain how loss to follow-up was addressed                                                                                                                       |                    |
|                           |        | (e) Describe any sensitivity analyses                                                                                                                                                | 12                 |
| <b>Results</b>            |        |                                                                                                                                                                                      |                    |

|                          |     |                                                                                                                                                                                                              |        |
|--------------------------|-----|--------------------------------------------------------------------------------------------------------------------------------------------------------------------------------------------------------------|--------|
| Participants             | 13* | (a) Report numbers of individuals at each stage of study—eg numbers potentially eligible, examined for eligibility, confirmed eligible, included in the study, completing follow-up, and analysed            | 12     |
|                          |     | (b) Give reasons for non-participation at each stage                                                                                                                                                         | 12     |
|                          |     | (c) Consider use of a flow diagram                                                                                                                                                                           |        |
| Descriptive data         | 14* | (a) Give characteristics of study participants (eg demographic, clinical, social) and information on exposures and potential confounders                                                                     | 14-15  |
|                          |     | (b) Indicate number of participants with missing data for each variable of interest                                                                                                                          | 12     |
|                          |     | (c) Summarise follow-up time (eg, average and total amount)                                                                                                                                                  |        |
| Outcome data             | 15* | Report numbers of outcome events or summary measures over time                                                                                                                                               | 18     |
| Main results             | 16  | (a) Give unadjusted estimates and, if applicable, confounder-adjusted estimates and their precision (eg, 95% confidence interval). Make clear which confounders were adjusted for and why they were included | 10, 16 |
|                          |     | (b) Report category boundaries when continuous variables were categorized                                                                                                                                    |        |
|                          |     | (c) If relevant, consider translating estimates of relative risk into absolute risk for a meaningful time period                                                                                             |        |
| Other analyses           | 17  | Report other analyses done—eg analyses of subgroups and interactions, and sensitivity analyses                                                                                                               | 17-18  |
| <b>Discussion</b>        |     |                                                                                                                                                                                                              |        |
| Key results              | 18  | Summarise key results with reference to study objectives                                                                                                                                                     | 19     |
| <b>Limitations</b>       |     |                                                                                                                                                                                                              |        |
| Interpretation           | 20  | Give a cautious overall interpretation of results considering objectives, limitations, multiplicity of analyses, results from similar studies, and other relevant evidence                                   | 19-21  |
| Generalisability         | 21  | Discuss the generalisability (external validity) of the study results                                                                                                                                        | 13     |
| <b>Other information</b> |     |                                                                                                                                                                                                              |        |
| Funding                  | 22  | Give the source of funding and the role of the funders for the present study and, if applicable, for the original study on which the present article is based                                                | 21     |

\*Give information separately for cases and controls in case-control studies and, if applicable, for exposed and unexposed groups in cohort and cross-sectional studies.

**Note:** An Explanation and Elaboration article discusses each checklist item and gives methodological background and published examples of transparent reporting. The STROBE checklist is best used in conjunction with this article (freely available on the Web sites of PLoS Medicine at <http://www.plosmedicine.org/>, Annals of Internal Medicine at <http://www.annals.org/>, and Epidemiology at <http://www.epidem.com/>). Information on the STROBE Initiative is available at [www.strobe-statement.org](http://www.strobe-statement.org).

# BMJ Open

## Age, occupational class, and sickness absence during pregnancy: A retrospective analysis study of the Norwegian population registry

|                                 |                                                                                        |
|---------------------------------|----------------------------------------------------------------------------------------|
| Journal:                        | <i>BMJ Open</i>                                                                        |
| Manuscript ID:                  | bmjopen-2013-004381.R1                                                                 |
| Article Type:                   | Research                                                                               |
| Date Submitted by the Author:   | 13-Mar-2014                                                                            |
| Complete List of Authors:       | Ariansen, Anja Maria; The University of Bergen, Department of sociology                |
| <b>Primary Subject Heading</b>: | Occupational and environmental medicine                                                |
| Secondary Subject Heading:      | Public health, Health policy, Epidemiology                                             |
| Keywords:                       | REPRODUCTIVE MEDICINE, PUBLIC HEALTH, OCCUPATIONAL & INDUSTRIAL MEDICINE, EPIDEMIOLOGY |
|                                 |                                                                                        |

SCHOLARONE™  
Manuscripts



1  
2  
3  
4  
5  
6  
7  
8 **Age, occupational class, and sickness absence during**  
9  
10 **pregnancy: A retrospective analysis study of the Norwegian**  
11  
12  
13 **population registry**  
14  
15  
16  
17  
18  
19  
20

21 Corresponding author: Anja MS Ariansen<sup>1</sup>  
22

23 <sup>1</sup>Department of Sociology, University of Bergen, Norway  
24  
25  
26  
27  
28  
29  
30  
31  
32  
33  
34  
35  
36  
37  
38  
39  
40  
41  
42  
43  
44  
45  
46  
47  
48  
49  
50  
51  
52  
53  
54  
55  
56  
57  
58  
59  
60

## Abstract

### Objective:

Western women increasingly delay having children to advance their career, and pregnancy is considered to be riskier among older women. In Norway, this development surprisingly coincides with increased sickness absence among young pregnant women, rather than their older counterparts. This paper tests the hypothesis that young pregnant women have a higher number of sick days because this age group includes a higher proportion of working class women, who are more prone to sickness absence.

### Design:

A zero-inflated Poisson regression was conducted on the Norwegian population registry.

### Participants:

All pregnant employees giving birth in 2004-2008 were included in the study. A total number of 216 541 pregnancies were observed among 180 483 women.

### Outcome measure:

Number of sick days

### Results:

1  
2  
3 Although the association between age and number of sick days was U-shaped, pregnant women  
4  
5 in their early 20ies had a higher number of sick days than those in their mid 40ies. This was  
6  
7 particularly the case for pregnant women with previous births. In this group, 20 year olds had  
8  
9 12.6 more sick days than 45 year olds; this age difference was reduced to 6.3 after control for  
10  
11 class. Among women undergoing their first pregnancy, 20 year olds initially had 1.2 more sick  
12  
13 days than 45 year olds, but control for class altered this age difference. After control for class, 45  
14  
15 year old first-time pregnant women had 2.9 more sick days than 20 year olds with corresponding  
16  
17 characteristics.  
18  
19  
20  
21

## 22 23 24 25 **Conclusion:**

26  
27 The negative association between age and sickness absence was partly due to younger age  
28  
29 groups including more working class women, who were more prone to sickness absence.  
30  
31

32 Young pregnant women's needs for job adjustments should not be underestimated.  
33  
34  
35  
36  
37

## 38 **Strengths and limitations of the study**

- 39  
40 • Retrospective analyses of a population registry reveal that heightened sickness  
41  
42 absence among young, pregnant women in Norway is partly due to a preponderance of  
43  
44 working class women in this age group.  
45  
46
- 47 • The data employed include information about all employees giving birth in 2004-  
48  
49 2008, thus the risks of Type I and Type II errors are eliminated.  
50  
51
- 52 • The data consist of official recordings, which make sure that the estimates do not  
53  
54 suffer from bias due to self-reporting or non-response.  
55  
56

- Because some absence spells are left censored, zero-inflated Poisson regression has been conducted.
- Although occupational class has a major impact on sickness absence among pregnant women in this study, the data do not allow for assessing the relative contribution of working conditions.
- Age differentials among pregnant women with previous deliveries remain largely unexplained.

## Objective

Western women increasingly delay having children to advance their career [1], and pregnancy is normally regarded as being riskier among older women [2]. In Norway, this development coincides with increased sickness absence during pregnancy. Somewhat surprisingly, the increased sickness absence primarily applies to young pregnant women rather than their older counterparts [3 4].

Previous research has revealed that sickness absence during pregnancy is influenced by the pregnant women's work place, both through adjustments and social interaction with colleagues [5 6]. This paper broadens the scope of this literature by emphasising how the women's work place is also influenced by recent shifts in fertility and employment patterns. Age during pregnancy has become increasingly linked to socioeconomic factors such as education and occupation [1]. The aim of this paper is to examine if the heightened sickness absence among young pregnant women in Norway is due to a preponderance of working class women in this group.

## Background and significance

Because the Norwegian sickness benefit is very generous, growing levels of sickness absence have created concern about future public costs [7]. In this context, more frequent sickness absence among young pregnant women may easily be seen as a reflection of unsustainable welfare consumption in younger generations. Such speculation is problematic, because pregnant women may respond to other's negative views on them with risky behavior [8].

1  
2  
3 The need for investigating sickness absence during pregnancy is further enhanced by studies  
4 suggesting that employers' or colleagues' negative expectations to the work performance or  
5 sickness absence of pregnant employees may challenge these women's career opportunities [5 9-  
6 12], even when the empirical basis for these assumptions is lacking [13-15]. These issues  
7 highlight the importance of ensuring that heightened sickness absence among young pregnant  
8 women is addressed through empirical investigation and evidence based policies rather than  
9 unsound generalisations and discrimination.  
10

11  
12  
13  
14  
15  
16  
17  
18  
19  
20  
21  
22  
23  
24  
25  
26  
27  
28  
29  
30  
31  
32  
33  
34  
35  
36  
37  
38  
39  
40  
41  
42  
43  
44  
45  
46  
47  
48  
49  
50  
51  
52  
53  
54  
55  
56  
57  
58  
59  
60

Sickness absence during pregnancy has increased substantially over the past two decades in Norway, and both the relative increase and the total level of sickness absence is highest among younger women [3 4 16]. However, the impact of occupational class on this age difference is unknown. Previous research on sickness absence during pregnancy has rarely focused on the impact of pregnant women's age and their class affiliation, except from three studies of Swedish data from the 1980ies, which reached different conclusions. The first study concluded that sickness absence during pregnancy in Sweden in the late 1980ies was characterised by class differentials, but only marginal age differentials [17]. However, the other two studies highlighted that a preceding increase in sickness absence during pregnancy particularly applied to young women [18], and that young age during pregnancy was associated with a higher frequency of sickness absence [19]. These findings indicate that high and increasing levels of sickness absence among young pregnant women is not a strictly Norwegian phenomenon.

Although the tight link between pregnant women's age and their class position has not received much attention in previous research on sickness absence, the issue has been highlighted in demographic research. "The second demographic transition", refers to growing female employment, postponement of pregnancy, and decreasing birth rates which has occurred in

1  
2  
3 western countries [20]. However, these trends primarily characterize women with higher  
4 education and privileged class positions [21 22]. In Norway, postponed first birth is often  
5 followed by a shorter duration between the first and second birth [23]. This leads to the  
6 expectation that class differentials in timing of pregnancy are larger in the group of first-time  
7 pregnant women than among those with previous births.  
8  
9

10  
11  
12  
13  
14  
15 As increased sickness absence among young pregnant women in Norway coincides with  
16 growing class differentials in timing of pregnancy, it seems relevant to question whether age  
17 differentials in sickness absence during pregnancy may be confounded by class. This concern is  
18 substantiated by a wide range of studies which emphasize the impact of occupational  
19 characteristics on pregnant women's health problems or sickness absence. Shift work and  
20 physical strain in terms of lifting or standing is associated with preterm birth [24 25]. Heavy  
21 lifting, as well as exposure to certain chemicals, increases the risk for miscarriage and decreased  
22 birth weight [26-28]. Physical strain increases sickness absence [29 30], while the opportunity  
23 for job adjustments reduces sickness absence [6 31]. Moreover, pregnant employees express that  
24 they strive to meet those standards of bodily control and appearance that are expected at their  
25 workplace [5 32]. These accounts highlight the need for adjustments, such as breaks and  
26 permission to work from home, which are more common in higher ranking occupations [33].  
27  
28  
29  
30  
31  
32  
33  
34  
35  
36  
37  
38  
39  
40  
41  
42  
43  
44  
45  
46  
47  
48  
49  
50  
51  
52  
53  
54  
55  
56  
57  
58  
59  
60

Class is also related to both sickness absence and pregnancy through norms and values. Sickness  
absence may be regarded more legitimate in a "working class culture" [34]. Working class  
occupations are also more gender segregated [35], and female-dominated work-places have  
somewhat higher levels of sickness absence in Norway, possibly because of gender specific  
norms [36]. Working-class women are more likely to express family-oriented values, while  
middle-class women more often are characterised by occupational dedication [37]. However,

1  
2  
3 housewives tend to have more health problems than employed women [38]. To the extent that  
4  
5 early pregnancy indicates future housewifery, this could thus be a choice born of necessity rather  
6  
7 than a preference for women with health problems.  
8  
9

10 To summarize, women's age at first pregnancy varies according to occupational class, and  
11  
12 occupational class may influence sickness absence during pregnancy in several ways. This leads  
13  
14 to the following hypotheses:  
15  
16

17  
18 H1: The negative association between age and sickness absence among pregnant  
19  
20 women is more pronounced among pregnant women undergoing their first  
21  
22 pregnancies than among pregnant women who have previously given birth.  
23  
24

25  
26 H2: The negative association between age and sickness absence levels out when  
27  
28 occupational class is controlled for, both among first-time pregnant women and those  
29  
30 who have previously given birth.  
31  
32  
33  
34  
35  
36

## 37 **Materials and Methods**

38  
39 The following analyses are based on data collected by the Norwegian Labour and Welfare  
40  
41 Administration, the Norwegian Tax Administration and the Ministry of Health and Care  
42  
43 Services. The national agency Statistics Norway of the Ministry of Finance has adapted the data  
44  
45 for research. The collected data include information about each individual of the entire  
46  
47 Norwegian population. Use of population data from public records ensures that our estimates are  
48  
49 not biased by non-response or self-reporting. Furthermore, the risk of type I or type II errors is  
50  
51 eliminated because the analyses are based on data from the population rather than from a random  
52  
53 sample.  
54  
55  
56



1  
2  
3 The data contain all women in the Norwegian population giving birth during the years 2004-  
4 2008. After deleting 2537 deliveries with unknown mothers, a total number of 286 104 deliveries  
5 were registered during the observed period. Further 30 of the registered deliveries were excluded  
6 due to missing value on the variable *Age*. Because the aim of the paper is to address the  
7 occupational challenges among young pregnant women rather than the particular difficulties  
8 associated with teen age pregnancies, 1473 teenage pregnancies were excluded from the  
9 analyses. Subsequently, the age span of the study population varied from 20 to 54, although less  
10 than 2% of the women were older than 40 at the year of delivery. Finally, 168 women were  
11 excluded due to lack of registration of the woman's marital status.  
12  
13  
14  
15  
16  
17  
18  
19  
20  
21  
22  
23

24 Of the remaining pregnancies, a total number of 216 541 met the inclusion criteria that the  
25 pregnant woman had registered earnings the year of delivery, and had worked at least 1 hour per  
26 week on average during the employed period of pregnancy. Of these, 16 286 had missing values  
27 on the variable of occupational class. A separate dummy variable for these observations was  
28 added to the set of dummy variables which occupational class consists of. About 0.6% of the  
29 registered sickness absence spells were excluded from the analyses due to missing value on the  
30 variable of compensated sick days. As some women underwent more than one of the registered  
31 pregnancies, a total number of 180 483 individuals are included in the analyses. Pregnancies  
32 applying to the same woman are treated as different observations in the analysis, thus the total  
33 number of observations is 216 541.  
34  
35  
36  
37  
38  
39  
40  
41  
42  
43  
44  
45  
46  
47

48 The generous sickness benefit provisions in Norway ensure that most employees listed as sick  
49 receive full wage compensation for an entire calendar year. The pay-out has an upper limit which  
50 in 2008 amounted to NOK 414 648, or about EUR 52 799. Separate rules for sickness absence  
51  
52  
53  
54  
55  
56  
57  
58  
59  
60

1  
2  
3 apply to self-employed, which makes comparison with employees difficult. For this reason self-  
4  
5 employed women were excluded from our analyses.  
6  
7

8 The registry only provides consistent recording of all spells of sickness absence from the 17th  
9  
10 calendar day, while recording of spells prior to this day depends on the woman's diagnosis and  
11  
12 her employers' request for imbursement. Each woman's value of the dependent variable *Sick*  
13  
14 *days* equals the total number of sick days for which she received the National Insurance sickness  
15  
16 benefit in the 282 days preceding birth. The variable also includes spells of absence covered by  
17  
18 the pregnancy benefit, which are certified by physicians if they consider the pregnant woman's  
19  
20 tasks or working environment to threaten the foetus. In order to prevent registration errors from  
21  
22 turning into influential outliers, the variable *Sick days* was limited to an upper value of 192. This  
23  
24 number amounts to 68% of the total number of calendar days of the total pregnancy period of  
25  
26 282 days, and is equivalent with the maximum percentage of calendar days compensated by the  
27  
28 National Insurance for non-pregnant employees during one year.  
29  
30  
31  
32  
33

34 A pregnancy period of 282 days is equal to the expected gestational age, which is counted  
35  
36 from the first day of the last menstrual period prior to conception, and extends the period from  
37  
38 conception to birth by 14 days. Norwegian health professionals frequently refer to gestational  
39  
40 age as a measure of pregnancy duration when consulting women who are or plan to become  
41  
42 pregnant, possibly increasing their awareness of symptoms even prior to conception. Because  
43  
44 this awareness may influence sickness absence behaviour, the categorisation of sickness absence  
45  
46 during pregnancy was based on expected gestational age.  
47  
48  
49

50 The occupational codes in the registry data were grouped according to the class scheme of  
51  
52 Eriksson, Goldthorpe and Portocarero (EGP) [39], by means of a detailed manual provided by  
53  
54 Flemmen [40]. Utilisation of the EGP class scheme ensures international comparability [41 42],  
55  
56

1  
2  
3 and the class scheme has shown a consistent association with health inequality [43 44], which  
4 makes it suited when investigating sickness absence. As mentioned earlier, self-employed  
5 women were excluded from the study population, and accordingly the class of self-employed  
6 was omitted from the analyses.  
7  
8  
9  
10  
11

12 The variable *Previous deliveries* indicates whether a woman is registered as having given  
13 birth since 1 January 1992. The variables *Age* equals the age of the pregnant woman at the year  
14 of the delivery. The variable *Age squared* was added to account for the possibility of a curved  
15 association between age and sickness absence.  
16  
17  
18  
19  
20  
21

22 Previous research indicates that the association between pregnant women's age and their  
23 occupation may be more pronounced during first pregnancies than subsequent ones [45]. The  
24 product of the variables *Age* and *Previous deliveries* is included in the regression analyses to  
25 account for such interactions.  
26  
27  
28  
29  
30  
31

32 All estimates are adjusted for possible confounders in terms of calendar year, weekly working  
33 hours, timing of transition to parental leave, and marital status, but for simplicity these control  
34 variables were left out of the analysis.  
35  
36  
37  
38  
39  
40

41 Thus, the following variables are included in the Results section:  
42

- 43 • *Sick days*. Continuous dependent variable, the natural logarithm of the pregnant woman's  
44 number of sick days covered by the National Insurance scheme;  
45  
46
- 47 • *Age*. Continuous independent variable. The age of the pregnant woman;  
48  
49
- 50 • *Age squared*. Continuous independent variable. The squared age of the pregnant woman;  
51  
52  
53  
54  
55  
56  
57  
58  
59  
60

- *Occupational class*. Dummy set of independent variables. Reference group: *I Higher professionals*. Other categories: *II Lower professionals, IIIa Higher routine, IIIb Lower routine, V Technicians, VI Skilled, VII Semi- and unskilled, VIIb Agricultural, Missing*;
- *Previous deliveries*. Independent dummy variable. Women with previous deliveries take the value of 1. Women who undergo their first pregnancy take the value of 0;
- *Age × Previous deliveries*. Independent interaction variable equaling the value of *Age* multiplied by the value of *Previous deliveries*;
- *Year*. Dummy set of control variables. Reference group: Women giving birth in 2004. Other categories: *Year 2005, Year 2006, Year 2007, Year 2008*;
- *Working hours*. Continuous control variable. Average number of hours of paid work per week;
- *Leave*. Continuous control variable. Total number of days between pregnancy onset and either transition to parental leave or date of delivery;
- *Marital status*. Dummy set of independent variables. Reference group: *Unmarried*. Other categories: *Married, Divorced, Widowed*.

## Methods

The dependent variable in the following analyses can be characterised as count data, because it represents the total number of sick days and thus only contains positive integer values. The

1  
2  
3 large proportion of women with the value of 0 on this variable indicates that the distribution may  
4  
5 be characterised by inflated zero, which means that both the value of the variable and the  
6  
7 likelihood of this value being zero is influenced by external factors [46]. For example, the value  
8  
9 of zero sick days can be influenced by working hours in two different ways. Because part-time  
10  
11 employees have a lower maximum number of sick days than do full-time employees, a larger  
12  
13 proportion of part-timers probably have no actual sick days. However, they are probably also  
14  
15 more likely to have shorter spells, which in turn are more likely to be left censored, and take the  
16  
17 value of 0 for this reason. This also applies to women with early transition to maternity leave. To  
18  
19 account for the excess of zero sick days among women with few working hours and/or early  
20  
21 transition to maternity leave, a zero-inflated Poisson regression model was conducted. This  
22  
23 choice of model was supported by a significant Vuong test, which indicates that the zip model  
24  
25 fits the data better than the standard Poisson model.  
26  
27  
28  
29  
30

31  
32 The zip model consists of two components, because the predicted value of *Sick days* is  
33  
34 combined with a prediction of the probability of achieving a value of zero. In the count  
35  
36 component, each regression coefficient reveals changes in the log of the expected value of  
37  
38 number of sick days produced by a one-unit increase in a given variable when other independent  
39  
40 variables are held constant. Because the substantial meaning of the coefficients is not readily  
41  
42 apparent, marginal plots will be provided for the core findings.  
43  
44  
45

46  
47 In excess zero component, the variables *Working hours* and *Leave* are used as predictors of  
48  
49 values exceeding zero in all four regression models. This indicates that the inflation of 0 sick  
50  
51 days is partly due to inclusion of employees with few contracted working hours and/or early  
52  
53 transition to parental leave, which reduces the possible number of sick days. In analyses of  
54  
55 samples drawn from a population, the purpose of significance testing regression coefficients is to  
56  
57  
58  
59  
60

assess the likelihood that the estimates that apply to the sample also apply to the population as a whole. For analyses based on a population rather than a sample drawn from it, this condition is already satisfied. For this reason, significance testing is left out of the following regression models.

## Results

Descriptive statistics of the study population is listed in Table 1, and confirms that higher and lower professionals are characterized by fewer sick days, higher age, and a higher number of working hours than the skilled and unskilled workers.

**Table 1. Descriptive statistics of the study population.** According to occupational class.

|                         | Sick days |      | Age  |     | Working hours |      | Leave |      | Married | Previous deliveries |
|-------------------------|-----------|------|------|-----|---------------|------|-------|------|---------|---------------------|
|                         | Mean      | Sd   | Mean | Sd  | Mean          | Sd   | Mean  | Sd   | %       | %                   |
| I Higher professionals  | 34.2      | 43.5 | 33.3 | 3.9 | 34.3          | 7.6  | 263.2 | 10.3 | 55.8    | 55.5                |
| II Lower professionals  | 39.8      | 45.5 | 32.5 | 3.9 | 33.8          | 7.6  | 263.2 | 10.2 | 50.7    | 53.6                |
| IIIa Higher routine     | 50.4      | 48.8 | 30.1 | 4.6 | 29.0          | 10.4 | 264.1 | 10.8 | 42.8    | 55.0                |
| IIIb Lower routine      | 54.6      | 50.0 | 29.0 | 5.0 | 25.9          | 11.6 | 264.8 | 11.1 | 35.5    | 53.0                |
| V Technicians           | 43.8      | 47.7 | 32.1 | 4.4 | 33.0          | 8.0  | 264.5 | 10.8 | 41.6    | 60.5                |
| VI Skilled              | 51.4      | 49.6 | 28.8 | 4.9 | 29.1          | 10.6 | 263.8 | 10.7 | 32.9    | 52.0                |
| VII Semi- and unskilled | 51.9      | 52.1 | 29.1 | 5.2 | 22.7          | 12.8 | 266.4 | 12.3 | 41.7    | 51.2                |
| VIIb Agricultural       | 37.6      | 47.0 | 28.3 | 4.9 | 24.9          | 12.9 | 265.9 | 12.0 | 35.2    | 51.1                |
| Missing                 | 41.6      | 46.6 | 30.8 | 4.7 | 29.2          | 11.1 | 264.0 | 11.0 | 48.1    | 55.5                |
| Total                   | 46.8      | 48.5 | 30.6 | 4.8 | 29.5          | 10.8 | 264.1 | 10.9 | 44.4    | 54.0                |

1  
2  
3 The distribution of *Sick days* is characterised by inflated zero (Figure 1). Investigation of the  
4 association between Age and Sickness absence among full-time employees indicates that the  
5 association is curved rather than linear (Figure 2).  
6  
7  
8  
9

10 Table 2 shows a zero-inflated Poisson regression, which includes two components. The *Count*  
11 *component* is a prediction of *Sick days*, and Models 1-4 show the varying associations that follow  
12 from different sets of independent variables. The *Excess zero component* predicts the probability  
13 of taking no sick days after control for *Working hours* and *Leave*, and remains unchanged in all  
14 four models. The Count component of Model 1 shows the unadjusted association between *Age*  
15 and *Sick days*, while Models 2-4 are adjusted for confounders.  
16  
17  
18  
19  
20  
21  
22  
23  
24  
25  
26

27 **Table 2.** Zero-inflated Poisson regression with number of sick days as the dependent variable.

28 The coefficients in the Count component are adjusted for Working hours, Leave, Year and  
29 Marital status in Models 2-4. The coefficients of the Excess zero component are adjusted for  
30 *Working hours* and *Leave* in all four models.  
31  
32  
33  
34  
35  
36  
37  
38  
39  
40  
41  
42  
43  
44  
45  
46  
47  
48  
49  
50  
51  
52  
53  
54  
55  
56  
57  
58  
59  
60

|                              | Model 1 | Model 2 | Model 3 | Model 4 |
|------------------------------|---------|---------|---------|---------|
| <b>Count component</b>       |         |         |         |         |
| Age                          | -0.016  | -0.017  | -0.049  | -0.031  |
| Age squared                  | 0.0002  | 0.0002  | 0.0007  | 0.0005  |
| Previous deliveries          |         |         | 0.374   | 0.330   |
| Previous deliveries x Age    |         |         | -0.008  | -0.007  |
| II Lower professionals       |         |         |         | 0.056   |
| IIIa Higher routine          |         |         |         | 0.185   |
| IIIb Lower routine           |         |         |         | 0.240   |
| V Technicians                |         |         |         | 0.069   |
| VI Skilled                   |         |         |         | 0.212   |
| VIIa Semi- and unskilled     |         |         |         | 0.285   |
| VIIb Agricultural            |         |         |         | 0.200   |
| Missing                      |         |         |         | 0.107   |
| Constant                     | 4.448   | 3.350   | 3.749   | 3.231   |
| <b>Excess zero component</b> |         |         |         |         |
| Constant                     | -1.341  | -1.341  | -1.341  | -1.341  |
| Observations                 | 216 541 | 216 541 | 216 541 | 216 541 |
| Cragg's and Uhler's          | 0.023   | 0.179   | 0.290   | 0.462   |

Model 1 reveals a positive coefficient for *Age squared*, which confirms the U-shaped association between age and sickness absence revealed in Figure 2. The coefficient is still positive after control for *Year*, *Working hours*, *Leave*, and *Marital status* in Model 2.

In Model 3, the variable *Previous deliveries* and the product of *Age* and *Previous deliveries* is included to investigate if the associations between age and sickness absence differ between women with and without previous births. Since the interpretation of the interaction coefficients is complicated, the interaction effect is illustrated in Figure 3.



1  
2  
3 The values of the coefficients change by control for occupational class in Model 4. The  
4 implications of this change are also illustrated in Figure 3. All the occupational classes have  
5 positive coefficients, indicating that each class has a higher number of sick days than the baseline  
6 category, which is *I Higher professionals*.  
7  
8  
9  
10  
11

12 Cragg and Uhler's R<sup>2</sup>, also referred to as Nagelkerke's R<sup>2</sup>, is a measure of model fit that  
13 varies between 0 and 1 [47]. High values indicate better prediction of counts in the current model  
14 than in the intercept model, which equals a model without independent variables. In Model 1, the  
15 value of Cragg and Uhler's R<sup>2</sup> is 0.023, which implies that controlling only for *Age* and *Age*  
16 *squared* brings about a limited improvement of prediction of the number of sick days. In Model  
17 2 and Model 3 the values of Cragg and Uhler's R<sup>2</sup> have increased to 0.179 and 0.290, which  
18 suggest that the prediction of sick days is substantially improved after controlling for the  
19 confounders, and further improved by control for previous births and the interactions of age and  
20 previous births. By control for occupational class in Model 4, the value increases to 0.462, thus  
21 prediction of sick days is considerably improved when occupational class is included in the  
22 model.  
23  
24  
25  
26  
27  
28  
29  
30  
31  
32  
33  
34  
35  
36  
37  
38

39 Figure 3 displays the various associations between age and number of sick days in the  
40 preceding regression models. As the graph for Model 1 indicates, the youngest and oldest women  
41 have the highest numbers of sick days. Before control for any covariates, the numbers of sick  
42 days among pregnant women aged 20, 30, and 45 are 48.9, 46.8 and 48.1, respectively. After  
43 control for Calendar year, Working hours, Leave and Marital status, the corresponding numbers  
44 are 49.9, 46.9, and 46.2, as revealed in the second graph, Model 2.  
45  
46  
47  
48  
49  
50  
51  
52

53 The interaction of previous deliveries and age is illustrated in the third graph, Model 3. Young  
54 pregnant women with previous deliveries are characterised by a considerably higher number of  
55  
56  
57  
58  
59  
60

1  
2  
3 sick days than equally aged women who are undergoing their first pregnancy. Pregnant women  
4  
5 with previous births at the aged of 20, 30 and 45 have 60.3, 49.2, and 47.7 sick days,  
6  
7  
8 respectively. Among first-time pregnant women, the corresponding numbers are 49.1, 43.5, and  
9  
10  
11 47.9.

12  
13 Finally, the last graph shows that among pregnant women with previous births, the association  
14  
15 between age and sick days is somewhat weakened after control for occupational class. However,  
16  
17 20 year old women in this group still have 55.1 sick days, which is a substantially higher number  
18  
19 than the 48.5 and 48.8 sick days which apply to 30 and 45 year olds. In contrast, control for class  
20  
21 alters the association between age and sickness absence among women undergoing their first  
22  
23 pregnancy. In this group, 30 year olds still have the lowest number of sick days, 43.4, but 20 year  
24  
25 olds now have a value of 45.8, which is considerably lower than the value of 48.7, which applies  
26  
27 to 45 year olds.  
28  
29  
30  
31  
32  
33

## 34 Discussion

35  
36  
37 The preceding analyses have shown that among pregnant women with previous births, young  
38  
39 employees still have higher numbers of sick days after control for class, although the association  
40  
41 between age and sick days is slightly weakened. However, among women undergoing their first  
42  
43 pregnancies, young pregnant women no longer have the highest level of sick days after control  
44  
45 for class. This indicates that the high number of sick days among young first-time pregnant  
46  
47 women is due to a preponderance of working class women in this group, who are more prone to  
48  
49 sickness absence. In younger age groups, women with previous deliveries have a higher number  
50  
51 of sick days than do first-time pregnant women, but the difference decreases with age and levels  
52  
53  
54  
55  
56 out in the mid 40ies. Regardless of previous pregnancies, pregnant women in their early 30ies

1  
2  
3 have the lowest number of sick days, and this pattern remains largely unchanged after control for  
4  
5 class.  
6

7  
8 Using data from the Norwegian population registry eliminates risks of Type I and II errors,  
9  
10 thereby representing a strength of the study. Because the data are recorded by public entities, the  
11  
12 empirical analyses do not suffer from non-response or self-reporting bias. Still, the registry has  
13  
14 certain weaknesses. First, registration of births first started in 1992, which implies that the few  
15  
16 number of women who gave birth prior to this year and had their next delivery during the  
17  
18 observation period are misclassified as women undergoing their first pregnancy. However, this  
19  
20 weakness only applies to women gave birth prior to 1992 and then had a birth interval of at least  
21  
22 12 years of duration, which is rare. Thus, any bias resulting from these misclassifications is  
23  
24 limited. Second, only days of sickness absence covered by the National Insurance is included in  
25  
26 the registry. For employees who do not suffer from pregnancy related conditions, this excludes  
27  
28 the first 16 calendar days of the spell. Since 2002, employers can request reimbursement from  
29  
30 National Insurance for expenditure on sickness absence among pregnant employees suffering  
31  
32 periods of illness with a pregnancy-related diagnosis. In these cases, spells are registered from  
33  
34 day one. This implies that the first 16 days are left censored for some spells, while other spells  
35  
36 are complete. Although censoring may vary according to employer characteristics, such variation  
37  
38 does not explain the high and increasing levels of sickness absence among young pregnant  
39  
40 women, because this trend started before the amendment in 2002 [16].  
41  
42  
43  
44  
45  
46  
47

48 The impact of excluding short term sickness absence is also limited, because only 32% of  
49  
50 Norwegian women's sickness absence is covered by the employer [48], and the figure is  
51  
52 probably lower for pregnant employees, considering the separate rules of employer imbursement  
53  
54 which applies to absence spells caused by pregnancy related diagnoses. Still, censoring may have  
55  
56

1  
2  
3 contributed to an excess zero in the distribution of sick days, although high numbers of zero  
4 often occur naturally in count data, which this variable in is an example of [46]. Zero-inflated  
5  
6  
7  
8 Poisson regression was conducted to account for excess zero in the distribution of sick days.  
9

10  
11 Controlling for occupational class implies a weakening of the negative association between  
12 age and sickness absence both among women undergoing their first pregnancy and those who  
13 have previously given birth. This indicates that the initial association between age and sickness  
14 absence during pregnancy is partly due to aspects of occupational class which these two groups  
15 have in common, such as physical and social working environment. However, occupational class  
16 only explains a small proportion of the heightened number of sick days among young pregnant  
17 women who have previously delivered. In this group, higher numbers of sick days apply to  
18 young pregnant women even after control for occupational class. Unfortunately, the data set does  
19 not allow for a more detailed analysis of this group, but previous research may hint at possible  
20 explanations.  
21  
22  
23  
24  
25  
26  
27  
28  
29  
30  
31  
32  
33

34  
35 Early transition to second or third births may reflect weaker employment orientation,  
36 especially since Norwegian women less frequently return to full-time employment after second  
37 or third births [49]. Accordingly, the association between high numbers of sick days and early  
38 transition to second or third births that we find in our analyses may indicate that the threshold for  
39 sickness absence is lower for women whose future prospects are oriented toward family building  
40 rather than employment. However, the well-known association between homemaking and health  
41 problems implies that the apparent family orientation indicated by early transition to second or  
42 third births may reflect health problems rather than preferences. It is also worth noticing that  
43 early transition to second or third birth occurs much less frequently in Norway today than just a  
44 few decades ago. Sickness absence among women who undertake such transitions should thus be  
45  
46  
47  
48  
49  
50  
51  
52  
53  
54  
55  
56  
57  
58  
59  
60

1  
2  
3 regarded in the light of the possible atypical situation of these women, because they may be  
4 affiliated with ethnic or religious groups that influence their sickness absence. Regardless of  
5 class and previous pregnancies, pregnant employees in their early 30ies are least prone to  
6 sickness absence. This may reflect a stronger work orientation in the group of women who  
7 postpone pregnancies to their 30ies, as compared to younger mothers. Pregnant employees'  
8 "*Strategies of Secrecy, Silence and Supra-performance*" [5] may shed light on this picture. In  
9 short, pregnant employees explain how they strive to adapt to workplace norms of occupational  
10 performance by delaying the announcement of their pregnancy, avoiding discussing it and  
11 compensating through increased flexibility and longer working hours, to demonstrate to their  
12 employer that the pregnancy does not make them less predictable or reliable as employees.  
13 Keeping sickness absence at an absolute minimum is also part of these strategies. Although these  
14 strategies seem quite hazardous, they also seem to reflect an important implicit assumption: the  
15 women do not want their pregnancy to jeopardise their occupational attachment. Women who  
16 postpone pregnancy to their early 30ies may be characterized by a general orientation toward  
17 future employment which also influences their number of sick days during pregnancy. From the  
18 late 30ies, the number of sick days during pregnancy increases with age, possibly due to  
19 increased biological challenges.

20  
21  
22 It is also worth noticing that young women with previous deliveries are more prone to  
23 sickness absence than first-time pregnant women, although the difference between these groups  
24 decreases with age. In other words, child care seems to inflate sickness absence more strongly  
25 among younger than among older pregnant women, which might indicate that early transition to  
26 motherhood is associated with rather traditional gender roles, while women who postpone  
27 pregnancy have partners who spend more time caring for children.

1  
2  
3  
4  
5  
6  
7  
8  
9  
10  
11  
12  
13  
14  
15  
16  
17  
18  
19  
20  
21  
22  
23  
24  
25  
26  
27  
28  
29  
30  
31  
32  
33  
34  
35  
36  
37  
38  
39  
40  
41  
42  
43  
44  
45  
46  
47  
48  
49  
50  
51  
52  
53  
54  
55  
56  
57  
58  
59  
60

Future research on sickness absence should aim to investigate the relative importance of working conditions, social environment, motivation, and health complaints for sickness absence during pregnancy. One should also investigate if other risk factors for sickness absence apply to pregnant women, as compared to non-pregnant women and men. Causes and consequences of sickness absence among young pregnant women with previous deliveries may be of particular interest, as these are particularly prone to absence and possibly also future labour market exclusion.

## Conclusion

Young pregnant women have higher frequency of sickness absence than their older counterparts. Contrary to expectations, the age differentials in sickness absence are stronger among pregnant women with previous deliveries than among those undergoing their first pregnancies. Occupational class largely accounts for the age differentials, but only among first-time pregnant women.

## Acknowledgements

Many thanks to Magne Flemmen and Patrick Andersen, who most kindly provided a detailed manual for categorising Norwegian occupations in accordance with the class scheme of Eriksson, Goldthorpe and Portocarero. Any possible errors in the analyses are of course my own. Thanks to my supervisor Prof. Hans-Tore Hansen for suggestions and feedback, and to Dr. Øystein Ariansen Haaland for statistical advice. Thanks also to Bo Vignes, Dr. Miia Bask, Gisle Andersen, Prof. Em. Kari Wærness, and Prof. Arne Kalleberg for useful comments on the paper.

## Funding and ethics

This work was supported by The University of Bergen, which had no influence on the content of this article. The author has no conflicting interests. Use of the Norwegian population registry in this project was approved by The Norwegian Data Protection Authority. No informed consent was required, because the data were analysed anonymously. There is no additional data available.

## Author contributions

Anja M. S. Ariansen designed the study, conducted the analyses, and wrote the paper.

## Competing Interests

None

## Data Sharing Statement

No additional data

## References

1. Mills M, Rindfuss RR, McDonald P, et al. Why do people postpone parenthood? Reasons and social policy incentives. *Human Reproduction Update* 2011;848-60.
2. Duckitt K, Harrington D. Risk factors for pre-eclampsia at antenatal booking: systematic review of controlled studies. *British Medical Journal* 2005;330(7491):565-67.
3. Markussen S, Røgeberg O. Sykefravær rundt større livshendelser [Sickness absence due to life events]. *Tidsskrift for Den norske legeforening* 2012;132:1231-34.
4. Rieck KME, Telle K. Sick leave before, during and after pregnancy. *Acta Sociologica* 2013;56(2):117-37.
5. Gatrell C. Policy and the Pregnant Body at Work: Strategies of Secrecy, Silence and Supra-performance. *Gender, Work & Organization* 2011;18(2):158-81.
6. Kristensen P, Nordhagen R, Wergeland E, et al. Job adjustment and absence from work in mid-pregnancy in the Norwegian Mother and Child Cohort Study (MoBa). *Occupational and Environmental Medicine* 2008;65(8):560-66.
7. OECD. *OECD Economic Surveys: Norway 2007*: OECD Publishing, 2007.
8. Gatrell C. 'I'm a bad mum': Pregnant presenteeism and poor health at work. *Social Science & Medicine* 2011;72(4):478-85.
9. Edwards ME. Pregnancy Discrimination Litigation: Legal Erosion of Capitalist Ideology Under Equal Employment Opportunity Law. *Social Forces* 1996;75(1):247-68.
10. Major VS. *Pregnancy in the workplace: Stigmatization and work identity management among pregnant employees*. University of Maryland, 2004.
11. Liff S, Ward K. Distorted views through the glass ceiling: the construction of women's understandings of promotion and senior management positions. *Gender, Work & Organization* 2001;8(1):19-36.
12. Acker J. Hierarchies, jobs, bodies: A theory of gendered organizations. *Gender & society* 1990;4(2):139-58.
13. Gatrell C. *Hard labour: The sociology of parenthood*: McGraw-Hill International, 2004.
14. Halpert JA, Wilson ML, Hickman JL. Pregnancy as a source of bias in performance appraisals. *Journal of Organizational Behavior* 1993;14(7):649-63.
15. Gueutal HG, Luciano J, Michaels CA. Pregnancy in the workplace: Does pregnancy affect performance appraisal ratings? *Journal of Business and Psychology* 1995;10(2):155-67.
16. Ariansen AM, Mykletun A. Do increased gender differences in sickness absence follow from postponement of pregnancy? A register based descriptive analysis of all Norwegian full-time employees in 1993-2007. *Plos One* 2014; **In press**.
17. Alexanderson K, Hensing G, Carstensen J, et al. Pregnancy-related sickness absence among employed women in a Swedish county. *Scand. J. Work Environ. Health* 1995;21(3):191-98.
18. Sydsjo A, Sydsjo G, Wijma B, et al. Changes in sick leave rates and the use of pregnancy-associated social benefits among pregnant Swedish women: An outcomes study. *Journal of Womens Health* 1998;7(2):249-60.
19. Sydsjo A, Alexanderson K, Dastserri M, et al. Gender differences in sick leave related to back pain diagnoses - Influence of pregnancy. *Spine* 2003;28(4):385-89.
20. Ron L. The Unfolding Story of the Second Demographic Transition. *Population and Development Review* 2010;36(2):211-51.



21. McLanahan S. Diverging destinies: How children are faring under the second demographic transition. *Demography* 2004;**41**(4):607-27.
22. Schmidt L, Sobotka T, Bentzen JG, et al. Demographic and medical consequences of the postponement of parenthood. *Human reproduction update* 2012;**18**(1):29-43.
23. Rønsen M. Fertility and public policies-Evidence from Norway and Finland. *Demographic Research* 2004;**10**(6):143-70.
24. Mozurkewich EL, Luke B, Avni M, et al. Working conditions and adverse pregnancy outcome: a meta-analysis. *Obstetrics & Gynecology* 2000;**95**(4):623-35.
25. Bonzini M, Coggon D, Palmer KT. Risk of prematurity, low birthweight and pre-eclampsia in relation to working hours and physical activities: a systematic review. *Occupational and environmental medicine* 2007;**64**(4):228-43.
26. Lindbohm M. Physical workload—a risk factor for miscarriage? *Scandinavian journal of work, environment & health* 2013.
27. Jurewicz J, Hanke W, Makowiec-Dąbrowska T, et al. Exposure to pesticides and heavy work in greenhouses during pregnancy: does it effect birth weight? *International archives of occupational and environmental health* 2005;**78**(5):418-26.
28. Burdorf A, Brand T, Jaddoe V, et al. The effects of work-related maternal risk factors on time to pregnancy, preterm birth and birth weight: the Generation R Study. *Occupational and Environmental Medicine* 2011;**68**(3):197-204.
29. Kaerlev L, Jacobsen LB, Olsen J, et al. Long-term sick leave and its risk factors during pregnancy among Danish hospital employees. *Scandinavian Journal of Public Health* 2004;**32**(2):111-17.
30. Strand K, Wergeland E, Bjerkedal T. Work load, job control and risk of leaving work by sickness certification before delivery, Norway 1989. *Scandinavian Journal of Social Medicine* 1997;**25**(3):193-201.
31. Strand K, Wergeland E, Bjerkedal T. Job adjustment as a means to reduce sickness absence during pregnancy. *Scand. J. Work Environ. Health* 1997;**23**(5):378-84.
32. Warren S, Brewis J. Matter over Mind? Examining the Experience of Pregnancy. *Sociology* 2004;**38**(2):219-36.
33. Johansson G, Lundberg I. Components of the Illness Flexibility Model As Explanations of Socioeconomic Differences in Sickness Absence. *International Journal of Health Services* 2009;**39**:123-38.
34. Virtanen P, Vahtera J, Nakari R, et al. Economy and job contract as contexts of sickness absence practices: revisiting locality and habitus. *Social Science & Medicine* 2004;**58**(7):1219-29.
35. Ellingsaeter AL. Scandinavian welfare states and gender (de)segregation: Recent trends and processes. *Economic and Industrial Democracy* 2013;**0**:1-18.
36. Mastekaasa A. Sickness absence in female- and male-dominated occupations and workplaces. *Social Science & Medicine* 2005;**60**(10):2261-72.
37. Duncan S, Irwin S. The social patterning of values and rationalities: mothers' choices in combining caring and employment. *Social Policy and Society* 2004;**3**(4):391-99.
38. Annandale E, Hunt K. *Gender inequalities in health*. Berkshire: Open University Press Buckingham, 2000.
39. Erikson R, Goldthorpe JH. *The constant flux: A study of class mobility in industrial societies*: Oxford University Press, USA, 1992.

- 1  
2  
3  
4  
5  
6  
7  
8  
9  
10  
11  
12  
13  
14  
15  
16  
17  
18  
19  
20  
21  
22  
23  
24  
25  
26  
27  
28  
29  
30  
31  
32  
33  
34  
35  
36  
37  
38
40. Flemmen MaA, P.L. . Implementering av EGP klasseskjema for norske registerdata [Implementation of the class scheme of Eriksson, Golthorpe and Portocarero on Norwegian register data]. Oslo: Institutt for sosiologi og samfunnsgeografi, Universitetet i Oslo, 2009.
  41. Krokstad S, Westin S. Health inequalities by socioeconomic status among men in the Nord-Trøndelag Health Study, Norway. *Scandinavian Journal of Public Health* 2002;**30**(2):113-24.
  42. Cavelaars AE, Kunst AE, Geurts JJ, et al. Morbidity differences by occupational class among men in seven European countries: an application of the Erikson-Goldthorpe social class scheme. *International Journal of Epidemiology* 1998;**27**(2):222-30.
  43. Muntaner C, Borrell C, Vanroelen C, et al. Employment relations, social class and health: A review and analysis of conceptual and measurement alternatives. *Social Science & Medicine* 2010;**71**(12):2130-40.
  44. Bartley M, Carpenter L, Dunnell K, et al. Measuring inequalities in health: an analysis of mortality patterns using two social classifications. *Sociology of Health & Illness* 1996;**18**(4):455-75.
  45. Lappegård T, Rønsen M. The Multifaceted Impact of Education on Entry into Motherhood. *European Journal of Population/Revue européenne de Démographie* 2005;**21**(1):31-49.
  46. Cameron AC, Trivedi PK. *Microeconometrics using stata*: Stata Press College Station, TX, 2009.
  47. Cragg JG, Uhler RS. The demand for automobiles. *The Canadian Journal of Economics/Revue canadienne d'Economie* 1970;**3**(3):386-406.
  48. Bjerkedal T, Thune O. Hva koster sykkelønnsordningen [What are the costs of the sickness benefit]. *Tidsskrift for Den norske legeforening* 2003;**123**:662-3.
  49. Rønsen M, Sundström M. Family policy and after-birth employment among new mothers—a comparison of Finland, Norway and Sweden. *European Journal of Population/Revue européenne de demographie* 2002;**18**(2):121-52.

## Figure legends

39  
40  
41  
42  
43

**Figure 1. Distribution of days of sickness absence in the study population.**

44  
45  
46  
47

**Figure 2. Days of sickness absence in different age groups.** Only full-time employees included (>=37 weekly working hours).

48  
49  
50  
51  
52  
53  
54  
55  
56  
57  
58  
59  
60

**Figure 3. Marginal effect of age in Models 1 to 4 in the regression analysis.**

1  
2  
3  
4  
5  
6  
7  
8  
9  
10  
11  
12  
13  
14  
15  
16  
17  
18  
19  
20  
21  
22  
23  
24  
25  
26  
27  
28  
29  
30  
31  
32  
33  
34  
35  
36  
37  
38  
39  
40  
41  
42  
43  
44  
45  
46  
47  
48  
49  
50  
51  
52  
53  
54  
55  
56  
57  
58  
59  
60

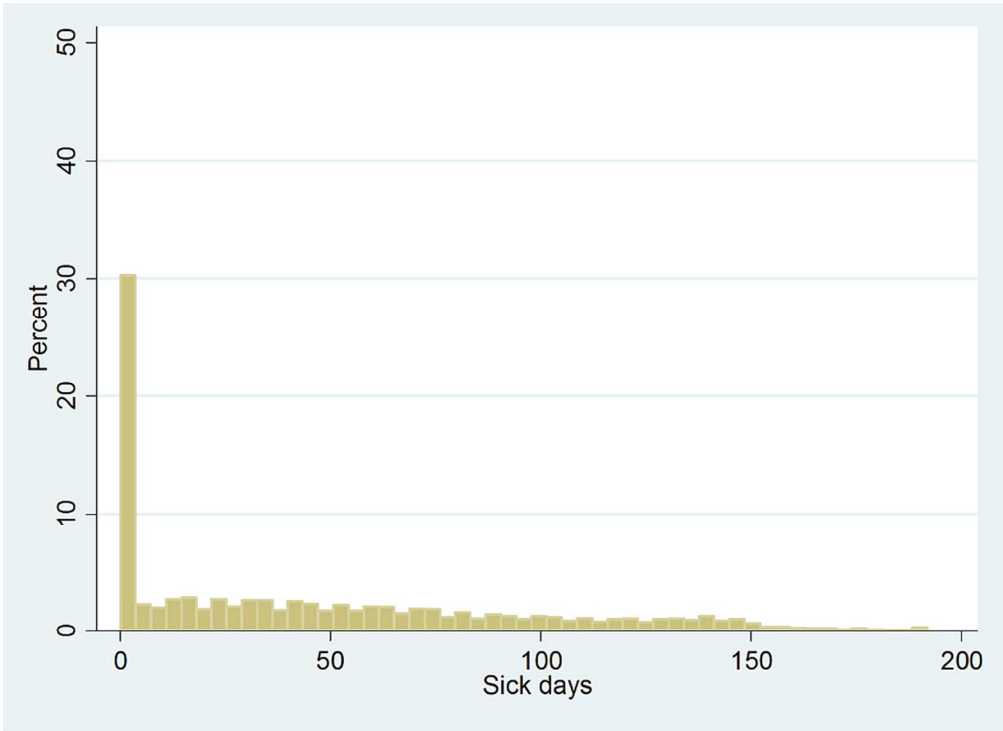

90x65mm (300 x 300 DPI)

view only

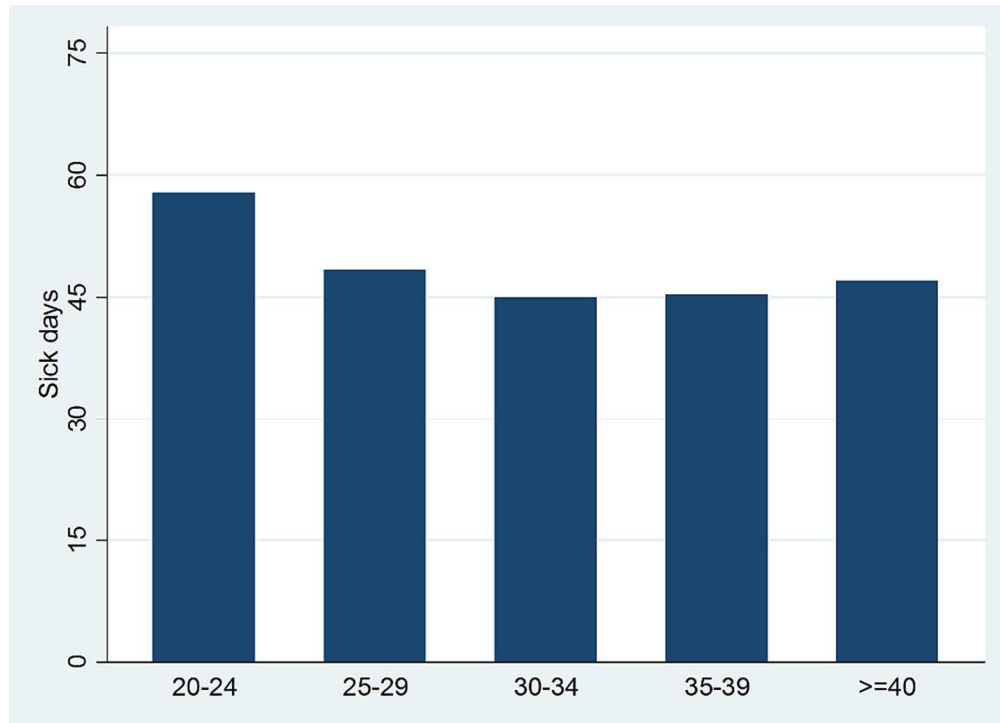

90x65mm (300 x 300 DPI)

View only

1  
2  
3  
4  
5  
6  
7  
8  
9  
10  
11  
12  
13  
14  
15  
16  
17  
18  
19  
20  
21  
22  
23  
24  
25  
26  
27  
28  
29  
30  
31  
32  
33  
34  
35  
36  
37  
38  
39  
40  
41  
42  
43  
44  
45  
46  
47  
48  
49  
50  
51  
52  
53  
54  
55  
56  
57  
58  
59  
60

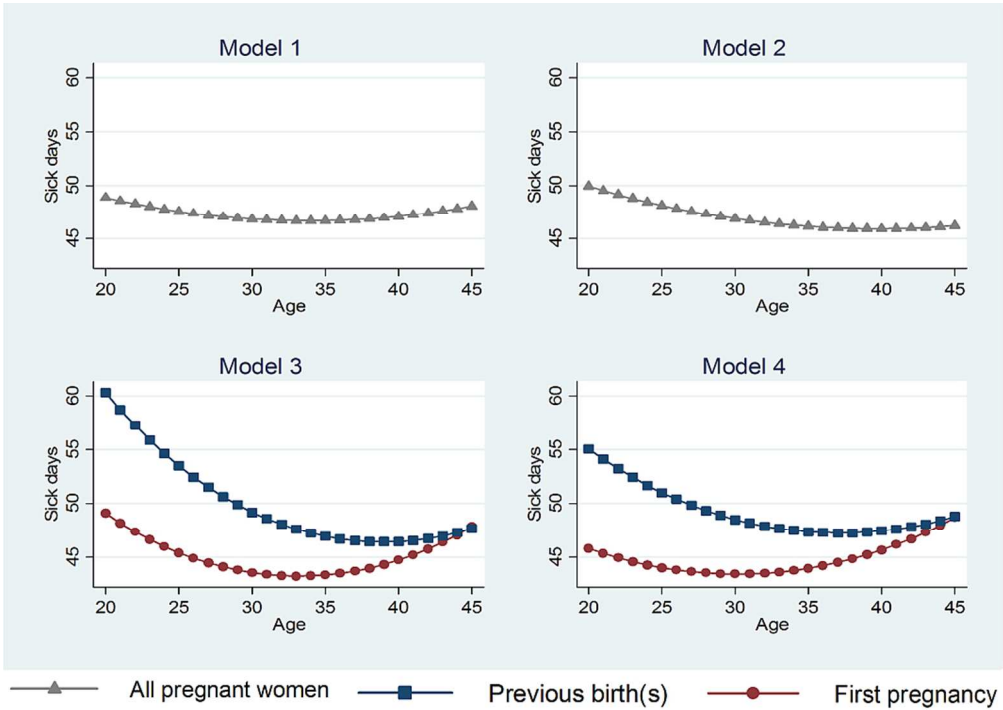

90x66mm (300 x 300 DPI)

Review only

STROBE 2007 (v4) Statement—Checklist of items that should be included in reports of *cohort studies*

| Section/Topic                | Item # | Recommendation                                                                                                                                                                       | Reported on page # |
|------------------------------|--------|--------------------------------------------------------------------------------------------------------------------------------------------------------------------------------------|--------------------|
| Title and abstract           | 1      | (a) Indicate the study's design with a commonly used term in the title or the abstract                                                                                               | 1                  |
|                              |        | (b) Provide in the abstract an informative and balanced summary of what was done and what was found                                                                                  | 2                  |
| <b>Introduction</b>          |        |                                                                                                                                                                                      |                    |
| Background/rationale         | 2      | Explain the scientific background and rationale for the investigation being reported                                                                                                 | 4-5                |
| Objectives                   | 3      | State specific objectives, including any prespecified hypotheses                                                                                                                     | 6                  |
| <b>Methods</b>               |        |                                                                                                                                                                                      |                    |
| Study design                 | 4      | Present key elements of study design early in the paper                                                                                                                              | 3                  |
| Setting                      | 5      | Describe the setting, locations, and relevant dates, including periods of recruitment, exposure, follow-up, and data collection                                                      | 7                  |
| Participants                 | 6      | (a) Give the eligibility criteria, and the sources and methods of selection of participants. Describe methods of follow-up                                                           | 12                 |
|                              |        | (b) For matched studies, give matching criteria and number of exposed and unexposed                                                                                                  |                    |
| Variables                    | 7      | Clearly define all outcomes, exposures, predictors, potential confounders, and effect modifiers. Give diagnostic criteria, if applicable                                             | 8-11               |
| Data sources/<br>measurement | 8*     | For each variable of interest, give sources of data and details of methods of assessment (measurement). Describe comparability of assessment methods if there is more than one group | 8-11               |
| Bias                         | 9      | Describe any efforts to address potential sources of bias                                                                                                                            | 9-10               |
| Study size                   | 10     | Explain how the study size was arrived at                                                                                                                                            | 12                 |
| Quantitative variables       | 11     | Explain how quantitative variables were handled in the analyses. If applicable, describe which groupings were chosen and why                                                         | 11-12              |
| Statistical methods          | 12     | (a) Describe all statistical methods, including those used to control for confounding                                                                                                | 12-13              |
|                              |        | (b) Describe any methods used to examine subgroups and interactions                                                                                                                  | 10                 |
|                              |        | (c) Explain how missing data were addressed                                                                                                                                          | 12                 |
|                              |        | (d) If applicable, explain how loss to follow-up was addressed                                                                                                                       |                    |
|                              |        | (e) Describe any sensitivity analyses                                                                                                                                                | 12                 |
| <b>Results</b>               |        |                                                                                                                                                                                      |                    |

|                          |     |                                                                                                                                                                                                              |        |
|--------------------------|-----|--------------------------------------------------------------------------------------------------------------------------------------------------------------------------------------------------------------|--------|
| Participants             | 13* | (a) Report numbers of individuals at each stage of study—eg numbers potentially eligible, examined for eligibility, confirmed eligible, included in the study, completing follow-up, and analysed            | 12     |
|                          |     | (b) Give reasons for non-participation at each stage                                                                                                                                                         | 12     |
|                          |     | (c) Consider use of a flow diagram                                                                                                                                                                           |        |
| Descriptive data         | 14* | (a) Give characteristics of study participants (eg demographic, clinical, social) and information on exposures and potential confounders                                                                     | 14-15  |
|                          |     | (b) Indicate number of participants with missing data for each variable of interest                                                                                                                          | 12     |
|                          |     | (c) Summarise follow-up time (eg, average and total amount)                                                                                                                                                  |        |
| Outcome data             | 15* | Report numbers of outcome events or summary measures over time                                                                                                                                               | 18     |
| Main results             | 16  | (a) Give unadjusted estimates and, if applicable, confounder-adjusted estimates and their precision (eg, 95% confidence interval). Make clear which confounders were adjusted for and why they were included | 10, 16 |
|                          |     | (b) Report category boundaries when continuous variables were categorized                                                                                                                                    |        |
|                          |     | (c) If relevant, consider translating estimates of relative risk into absolute risk for a meaningful time period                                                                                             |        |
| Other analyses           | 17  | Report other analyses done—eg analyses of subgroups and interactions, and sensitivity analyses                                                                                                               | 17-18  |
| <b>Discussion</b>        |     |                                                                                                                                                                                                              |        |
| Key results              | 18  | Summarise key results with reference to study objectives                                                                                                                                                     | 19     |
| <b>Limitations</b>       |     |                                                                                                                                                                                                              |        |
| Interpretation           | 20  | Give a cautious overall interpretation of results considering objectives, limitations, multiplicity of analyses, results from similar studies, and other relevant evidence                                   | 19-21  |
| Generalisability         | 21  | Discuss the generalisability (external validity) of the study results                                                                                                                                        | 13     |
| <b>Other information</b> |     |                                                                                                                                                                                                              |        |
| Funding                  | 22  | Give the source of funding and the role of the funders for the present study and, if applicable, for the original study on which the present article is based                                                | 21     |

\*Give information separately for cases and controls in case-control studies and, if applicable, for exposed and unexposed groups in cohort and cross-sectional studies.

**Note:** An Explanation and Elaboration article discusses each checklist item and gives methodological background and published examples of transparent reporting. The STROBE checklist is best used in conjunction with this article (freely available on the Web sites of PLoS Medicine at <http://www.plosmedicine.org/>, Annals of Internal Medicine at <http://www.annals.org/>, and Epidemiology at <http://www.epidem.com/>). Information on the STROBE Initiative is available at [www.strobe-statement.org](http://www.strobe-statement.org).
